# Supplementary material for: The cuticular hydrocarbon profiles of honey bee workers develop via a socially-modulated innate process
Source: eLife. 2019 Feb 5;8:e41855. doi: 10.7554/eLife.41855 (PMC6382352; doi:10.7554/eLife.41855)
Supplement: Figure 1—source data 1. [file elife-41855-fig1-data1.xlsx]

## Sheet: 2016 data
	age	C18:1	C23:1	C23	C24	C25:1	C25	C27:1	C27	11,13 methyl C27	C28	C29:1	C29	11,13 methyl C29	z(7) C31:1	z(9) C31:1	C31	C33:2	C33:1	C33	sum
TB_01_001	1	94.52	93.8	1058.52	37.06	115.88	1160.09	40.21	5375.16	1570.06	322.3	368.65	4632.29	2012.48	2407.68	1842.07	2849.77	766.65	5720.63	302.15	30770
TB_01_002	1	0	128.74	1187.76	43.39	124.24	929.66	189.62	3396.95	1502.75	181.33	265.34	2970	1798.6	1752.1	1380.78	1716.18	824.88	4286.6	190.69	22869.6
TB_01_003	1	178.65	133.97	1875.24	48.49	177.24	1422.11	935.47	4695.24	1678.36	407.62	328.86	4138.86	2139.45	2180.36	1867.97	2853.03	937.27	6039.6	315.96	32353.8
TB_01_004	1	58.28	106.95	1190.83	38.44	113.41	1225.12	580.24	4514.79	1558.24	211.04	173.32	3401.35	1730.85	1593.41	1291.23	2183.71	779.65	4833.56	287.57	25872
TB_01_005	1	431.35	103.96	1115.33	36.08	120.91	1134.72	95.3	4610.32	1194.73	260.05	271.44	3419.81	1507.7	1844.85	1586.77	2651.2	860.43	6334.01	357.09	27936
TB_01_006	1	21.88	154.65	1486.96	53.23	152.68	1619.62	233.24	6369.93	1756.71	248.79	344.98	4458.23	2152.99	2085.34	1784.71	3002.71	902.29	5473.1	320.34	32622.4
TB_01_007	1	88.61	134.6	1218.46	40.78	143.95	1253.24	594.19	5100.8	1480.16	228.78	327.42	3928.45	1890.61	1782.43	1364.48	2253.49	816.27	4746.89	270.63	27664.2
TB_01_008	1	302.02	116.87	1849.09	50.87	129.72	1500.41	211.27	6107.58	1509.75	326.35	322.35	4182	1874.39	1796.84	1458.33	2264.1	657.63	4396.72	212.81	29269.1
TB_07_001	7	522.14	89.03	613.84	32.8	169.08	1037.5	69.7	3623.88	730.2	143.31	411.54	2967.7	652.92	3087.71	2327.21	2838.79	4161.01	12047.6	533.25	36059.2
TB_07_002	7	1330.37	51.06	546.88	35.52	109.73	990.95	54.54	2913.68	619.36	148.38	354.84	2968.18	548.29	2525.43	2384.85	3656.43	3563.49	7778.3	702.11	31282.4
TB_07_003	7	962.52	85.82	1109.58	53.21	174.93	1718.78	78.79	4845.52	945.79	219.62	478.17	4705.83	883.34	3713.02	3403.53	4554.09	5439.61	11694	670.16	45736.4
TB_07_004	7	920.6	62.41	645.72	34.4	155.41	1233.18	62.53	3649.02	526.66	155.81	410.3	3040.36	526.25	3097.44	2548.5	2540.99	3478.35	7964.27	351.65	31403.9
TB_07_005	7	164.8	78.79	546.12	31.24	146.73	751.49	49.96	2137.63	593.1	100.11	362.46	2302.97	529.65	2986.27	2319.66	2266.38	3473.51	8514.15	344.6	27699.6
TB_07_006	7	2094.24	121.05	1200.61	58.36	257.87	1797.1	93.68	4856.35	629.33	202.92	466.36	4632.91	579.52	2990.3	2847.55	4720.22	3673.06	9125.72	746.42	41093.6
TB_07_007	7	2145.73	80.15	734.56	41.78	133.11	865.34	55.59	2072.82	522.56	110.59	356.78	1964.55	458.82	2402.1	2210.53	2256.7	3626.81	7315.35	399.45	27753.3
TB_07_008	7	1570.76	125.61	1091.98	47.12	192.21	1637.18	75.57	4396.49	847.17	236.16	485.21	4307.57	793.97	3440.13	2948.91	3622.88	3797.84	7178.01	443.35	37238.1
TB_14_001	14	1534.6	50.2	708.83	44.78	129.45	1430.79	454.61	3465.03	518.52	187.19	519.01	2944.15	453.06	2831.47	2392.14	2743.82	4470.22	6814.91	515.2	32208
TB_14_002	14	2425.31	42.72	623.86	53.69	80.26	1366.01	249.86	4112.22	603.49	263.17	423.35	4347.89	564.2	3119.14	2958.51	4013.21	3570.42	7479.62	546.94	36843.9
TB_14_003	14	932.85	46.07	594.11	36.17	111.43	1217.93	434.62	3674.08	502.43	206.82	438.04	3393.65	488.31	3161.57	2844.17	2996.55	5637.84	7240.66	442.15	34399.5
TB_14_004	14	1352.38	90.36	908.88	51.02	170.84	1470.73	235.19	4458.51	607.23	174.31	394.47	3564	611.87	2947.29	2334.76	3058.48	4194.13	6991.53	437.67	34053.6
TB_14_005	14	1918.36	47.66	555.32	39.58	144.14	1236.64	211.57	4302.26	536.42	170.27	576.34	3970.59	541.27	3912.26	3122.65	3340.28	4813.32	9429.96	565.18	39434.1
TB_14_006	14	2208.59	62.39	555.63	39.4	109.62	1180.87	304.48	3736.71	478.61	382.92	490.41	3192.8	425.67	3365.79	2830.21	3062.62	6114.06	9636.73	601.39	38778.9
TB_14_007	14	3078.93	100.63	663.48	56.75	142.53	1397.01	280.69	3399.59	453.43	329.8	497.75	3200.19	377.94	3547.64	2592.18	2673.75	4252.98	6810.36	431.35	34287
TB_14_008	14	4095.78	109.08	897.64	50.35	167.22	1613.43	228.84	3854.47	507	162.17	533.6	3669.9	461.4	3810.74	2974.07	2876.91	4553.43	6987.01	342.44	37895.5
TB_21_001	Forager	488.35	23.61	996.67	72.18	104.68	2625.47	380.1	8219.61	466.58	206.37	565.97	4660.41	467.7	3852.23	3040.63	2998.58	5277.29	7499.71	335.27	42281.4
TB_21_002	Forager	343.68	24.12	391.7	33.81	83.82	946.09	258.34	2556.97	447.12	106.15	371.66	2222.43	423.34	2896.73	2152.5	1843.88	5471.97	5240.73	313.18	26128.2
TB_21_003	Forager	2605.59	97.91	805.4	48.51	176.79	1239.33	313.18	2859.4	635.26	125.92	653.86	2422.41	559.58	3184.48	2532.32	2062.71	6020.59	6204.52	283.78	32831.5
TB_21_004	Forager	876.06	57.66	758.02	47.21	160.85	1630.85	302.04	4833.82	635.39	186.72	664.73	4413.09	595.33	4111.28	3298.94	3984.28	6825.09	7640.92	567.12	41589.4
TB_21_005	Forager	7159.26	86.08	597.51	37.15	90.44	1273.59	275.81	3887.3	464.84	152.21	466.04	4120.67	481.11	3628.07	3009.77	3832.31	5317.55	8383.45	643.79	43907
TB_21_006	Forager	2091.78	60.4	544.32	37.12	102.97	1119.41	522.72	3121.19	510.6	344.74	431.14	2608.36	489.93	3036.85	2427.83	2201.04	5683.45	6488.96	352.39	32175.2
TB_21_007	Forager	2787.76	57.27	461.15	38.45	96.88	1068.8	333.85	2287.7	371.18	128.69	453.68	2511.02	375.61	3315.28	2545.13	2051.69	3694.06	4960.77	236.15	27775.1
TB_21_008	Forager	3367.94	87.28	745.01	50.82	165.47	1819.59	337.88	5021.86	484.34	185.76	519.24	4414.58	470.24	3475.67	2981.67	4259.24	4519.45	7808.26	791.14	41505.4

## Sheet: 2015 data (figure supp 1)
	age	C18:1	C23:1	C23	C24	C25:1	C25	C27:1	C27	11,13 methyl C27	C28	C29:1	C29	11,13 methyl C29	z(7) C31:1	z(9) C31:1	C31	C33:2	C33:1	C33	sum
C1E_001	1	2151.81	331.97	3796.04	147.24	328.75	4135.29	488.07	13446.1	1442	348.63	721.05	7881.54	1498.14	3160	2181.7	4878.85	325.55	8511.07	605.51	56379.3
C1E_003	1	932.39	199.39	1950.99	78.73	210.69	2217.24	72.13	8542.07	1216.83	203.12	369.2	4332.57	1748.43	2239.15	1387.25	2897.95	214.98	6601.36	381.02	35795.5
C1E_004	1	92.12	169.63	2161.54	98.73	215.25	3372.57	164.45	10326.8	1526.99	461.22	314.03	4411.62	1997.58	1882.82	1173.72	3198.84	185.9	6163.14	434.71	38351.7
C1E_005	1	1182.69	102.7	1438.83	56.47	122.87	1805.74	114.67	7311.88	1157.6	160.26	321.27	3827.72	1306.5	1801.8	1167.2	2525.88	211.38	6282.54	320.43	31218.4
C1E_006	1	515.67	154.18	1922.04	97.59	278.68	3460.89	191.4	15729.1	880.34	391.05	601.13	9343.05	1325.16	2833.33	2232.33	7485.5	452.37	13604.4	1244.47	62742.7
C1E_007	1	941.73	175.15	2191.48	73.4	186.05	2391.87	105.47	6224.4	2015.22	142.71	195.18	2550.88	2338.89	1217.09	652.77	1793.49	66.75	3566.28	255.52	27084.3
C7E_001	7	5609.55	412.52	924.48	70.44	275.33	2199.2	207.59	10021.3	893.75	422.04	902.12	14739.5	811.6	6376.56	5236.08	14002.8	1719.54	18729.2	2030.69	85584.3
C7E_002	7	3143.08	178.13	641.31	49.48	212.61	1258.23	307.89	6875.52	632.13	328.09	899.78	8985.08	1072.42	6011.01	4527.93	9076.27	2819.68	21507.8	1974.41	70500.9
C7E_003	7	3322.99	379.46	1526.34	156.83	722.76	5157.77	841.43	14126.4	685.51	371.69	1569.43	9167.51	793.86	3630.84	2766.93	10596.5	1588.04	13589.7	3797.49	74791.5
C7E_004	7	4370.19	182.02	702.8	60.65	275.24	1912.83	398.92	12992	811.34	530.71	1078.06	14452	834.26	4674.69	3952.39	17306.1	1272.19	18777.4	4192.1	88775.9
C7E_005	7	4734.26	286.12	2454.5	328	556.06	6490.78	631.41	11124.1	359	172.1	954.25	3276.07	506.95	1924.11	1045.61	2060.98	568.81	4513.67	376.31	42363
C7E_006	7	3604.21	110.11	425.51	43.47	152.58	954.94	158.48	3669.79	423.15	149.09	536.17	4341.67	479.96	4395.17	2963.5	4812.74	1318.69	15851	990.47	45380.7
C7E_007	7	3987.85	336.11	2109.23	107.87	550.57	3581.31	545.72	13139.8	1177.47	608.07	1575.82	15152.1	1270.64	7382.72	5589.87	10633.6	1474.68	24188.1	1623.68	95035.1
C7E_008	7	3729.91	135.12	451.57	37.37	208.4	1012.45	206.06	5205.81	797.98	309.35	868.26	11286.1	635.03	8566.21	6884.8	12043.1	3036.19	27853.9	2335.6	85603.2
C14E_001	14	8457.23	422.8	1282.59	76.68	520.86	2320.09	390.5	8993.08	593.33	340.56	1394.09	10092.6	609.93	7947.82	5697.15	9561.98	1513.58	26083.2	1773.62	88071.8
C14E_002	14	6308.72	451.62	2215.24	182.01	673.43	6915.27	1063.37	15778.1	331.41	426.05	1351.62	11429.3	533.71	3270.63	2335.93	7685.87	863.43	7924.04	1643.75	71383.5
C14E_003	14	4740.61	284.18	1325.56	78.75	542.8	3028.57	435.57	6878.25	298.49	571.45	1403.39	18683.9	449.92	7177.61	6108.13	17712.7	1518.1	12961.3	2382.38	86581.7
C14E_004	14	3086.68	151.38	1889.58	144.45	328.37	5484.15	284.97	29372.9	789.9	812.27	1477.94	24578.1	724.99	8309.57	7355.35	24656.2	2100.19	33661.4	4991.31	150200
C14E_005	14	3230.89	793.34	11522.2	503.91	1828.18	26187.5	1124.7	20365.4	250.79	259.9	1023.56	5258.34	445.49	2542.27	1731.57	2359.69	478.64	5865.05	365.27	86136.7
C14E_006	14	2387.89	1180.02	5556.1	404.62	2728.24	17310.2	2627.26	23330.8	871.44	317.06	3220.98	6789.42	855.89	7426.23	4532.66	3166.87	1432.83	16383.7	442.39	100965
C14E_007	14	4403.04	174.79	863.58	86.26	304.64	2251.76	239.45	9867.73	376.7	472.79	1015.35	14980	364.5	5925	4051.23	9560.28	1255.8	14350.9	1299.26	71843.1
C14E_008	14	2670.74	136.04	735.09	56.28	311.27	1783.85	270.71	5514.42	503.07	242.18	1048.43	6698.77	296.82	6882.32	4839.7	5959.51	1668.3	19020.7	980.32	59618.5
C18E_001	Forager	3714.64	494.58	1681.95	110.09	678.71	3196.73	511.59	6991.57	272.81	345.44	1061.98	10728.2	255.12	6575.81	4875.93	9792.7	2749.82	15861.1	1719.62	71618.4
C18E_002	Forager	15431.9	577.72	1755.41	109.78	616.22	3325.74	427.1	10564.1	451.84	429.19	1095.8	14013.5	376.68	5117.59	4427.23	12932.8	1636.69	14727	1986.21	90002.5
C18E_003	Forager	4881.4	200.57	873.88	269.16	316.07	1888.48	251.31	4938.3	453.94	414.7	1082.71	11531.3	628.29	6417.09	5568.56	11051.6	1355.31	9792.24	1376.05	63291
C18E_004	Forager	1604.9	851.96	14413.5	470.86	1652.29	19452.5	959.9	12347	336.91	239.34	353.56	5276.49	449.79	2153.29	1383.33	3293.2	484.2	4624.73	497.35	70845.2
C18E_005	Forager	6032.01	1728.11	23986.7	634.4	2164.78	21504.5	1053.85	10865	368.02	178.01	909.66	3323.71	238.87	1664.27	897.12	2176.75	257.59	3323.13	367.18	81673.6
C18E_006	Forager	5945.49	706.46	3377.18	142.19	1046.6	4602.59	829.81	10156.2	1868.85	394.5	663.25	9067.31	311.36	3824.42	3092.52	7823.53	1589.03	11134	1978.16	68553.5
C18E_007	Forager	2372.97	287.58	1364.33	81.31	528.86	2553.76	417.1	7431.88	278.43	321.75	1309.48	8798.03	417.39	5230.47	3283.56	4325.67	1681.39	7954.32	576.25	49214.5
