# Supplementary material for: The cuticular hydrocarbon profiles of honey bee workers develop via a socially-modulated innate process
Source: eLife. 2019 Feb 5;8:e41855. doi: 10.7554/eLife.41855 (PMC6382352; doi:10.7554/eLife.41855)
Supplement: Figure 2—source data 1. [file elife-41855-fig2-data1.xlsx]

## Sheet: SCC 1 week (2A)
	task	C18:1	C23:1	C23	C24	C25:1	C25	C27:1	C27	11,13 methyl C27	C28	C29:1	C29	11,13 methyl C29	z(7) C31:1	z(9) C31:1	C31	C33:2	C33:1	C33	sum
SCC_Y_F01	Forager	1446.24	1060.34	7898.97	419.808	2502.65	20051.7	1181.41	9338.1	381.903	142.721	577.634	2771.59	279.689	2132.67	1778.48	1780.89	716.447	6127.33	226.333	60814.9
SCC_Y_F02	Forager	2038.17	171.007	2172.93	135.023	459.6	5813.75	868.828	10706.9	829.738	412.072	902.949	3085.96	591.089	2350.73	1823.46	1927.57	1180.94	6192.37	281.384	41944.4
SCC_Y_F03	Forager	7683.78	308.104	2097.28	267.782	948.169	12202.8	1658.26	20854.4	548.394	314.075	814.781	4711.02	398.677	2913.51	2284.91	2761.07	1024.95	6889.03	359.588	69040.7
SCC_Y_F04	Forager	1574.64	87.3872	1123.99	70.0546	121.577	1747.01	89.4079	6919.19	526.829	255.521	1040.37	5182.37	412.724	3625.9	2659.34	3441.87	1109.22	7649.03	535.703	38172.1
SCC_Y_F05	Forager	5799.87	185.145	1529.87	168.934	530.35	7408.38	1228.85	12740.9	469.673	131.076	889.668	2374.34	329.556	2433.74	1758.05	1502.1	846.188	5789.05	188.126	46303.9
SCC_Y_F06	Forager	945.974	474.42	3764.5	241.757	1110.92	9616.59	986.095	8861.69	807.411	279.557	693.167	3304.37	649.252	2229.03	1807.45	1724.31	923.561	5702.77	160.425	44283.3
SCC_Y_F07	Forager	1635.77	91.3092	682.396	45.6905	182.427	1136.58	106.108	2663.35	542.527	304.735	528.351	3171.92	353.065	3029.35	2823.23	3858.68	2590.05	9061.71	481.888	33289.1
SCC_Y_F08	Forager	4995.57	132.213	900.903	88.5427	139.18	2734.14	239.904	10816.1	557.523	408.564	1333.29	4684.08	401.748	3310.74	2182	2320.2	1048.37	6344.01	285.376	42922.4
SCC_Y_N01	Nurse	2249.14	78.957	1042.86	73.6467	109.394	2561.33	78.4917	9305.85	432.393	333.798	662.868	8594.64	346.272	4629.66	4461.13	8730.3	1800.45	16271.8	1587.08	63350
SCC_Y_N02	Nurse	4421.46	101.307	795.888	59.9727	79.7703	1442.69	124.058	5644.05	357.556	283.732	767.343	5884.22	232.611	5650.05	4283.65	4844.35	1431.5	12799.5	664.968	49868.6
SCC_Y_N03	Nurse	1175.45	58.5906	1261.42	70.327	104.727	1999.13	75.0434	7294.34	523.028	346.208	1044.12	8839.51	378.505	6528.53	5773.97	6797.7	2275.44	12541.1	728.481	57815.6
SCC_Y_N04	Nurse	1244.56	56.7069	1113.05	59.4558	99.6051	1801.11	69.7393	7078.47	697.566	283.425	596.104	7056.14	629.456	5258.05	4651.94	6891.56	2597.51	18770.7	944.829	59900
SCC_Y_N05	Nurse	1310.21	61.554	1212.85	55.1282	90.248	1510.56	63.8105	5727.99	543.067	277.197	765.035	7295.61	384.742	5960.66	5469.03	6932.97	2268.7	21042.6	1193.51	62165.5
SCC_Y_N06	Nurse	127.339	35.3462	479.002	41.2397	64.3725	1486.37	51.5058	5993.49	985.015	226.616	414.321	4657.09	818.372	4202.16	3349.99	5227.95	3119.06	16426.4	1099.31	48805
SCC_Y_N07	Nurse	1006.22	0	335.246	37.5219	37.3546	1267.28	0	8648.84	312.665	379.595	518.882	6738.94	248.943	3353.84	2494.27	5225.86	1068.53	12178.6	617.809	44470.4
SCC_Y_N08	Nurse	1474.91	65.8245	673.475	41.9996	84.7165	1156.15	56.9172	4146.78	732.691	203.518	537.683	5239.59	533.724	4628.65	4104.61	6806.23	3161.5	17530.8	1244.94	52424.7

## Sheet: SCC 3 weeks (2B)
	task	C18:1	C23:1	C23	C24	C25:1	C25	C27:1	C27	11,13 methyl C27	C28	C29:1	C29	11,13 methyl C29	z(7) C31:1	z(9) C31:1	C31	C33:2	C33:1	C33	sum
SCC_O_F01	Forager	3720.47	334.906	2585.29	245.508	1164.86	13889	2210.65	18656.7	204.726	249.004	1336.02	4612.26	134.779	2994.6	2424.52	3106.07	1608.65	5316.43	389.395	65183.8
SCC_O_F02	Forager	3008.1	783.25	6166.75	337.492	2028.18	14331.2	1272.25	8704.82	44.8892	379.653	478.811	2041.87	47.1533	550.647	484.152	1229.25	286.079	1522.15	160.767	43857.5
SCC_O_F03	Forager	12070	1080.46	8437.81	680.728	3517.04	36237.1	2920.46	19138.7	127.919	325.113	910.427	2881.94	113.316	1436.35	1140.77	1908.09	916.404	3375.12	289.961	97507.7
SCC_O_F04	Forager	1710.77	133.03	1342.74	108.155	350.449	3471.13	618.243	10685.2	93.9477	475.715	1177.17	5053.3	72.813	2239.97	1646.98	2845.38	1020.92	3394.04	300.785	36740.7
SCC_O_F05	Forager	3391.39	1210.87	8408.05	306.686	2576.75	9846.26	774.348	4936.12	44.3459	118.474	421.761	2041.97	41.9203	983.698	871.627	1412.61	628.537	2446.89	209.582	40671.9
SCC_O_F06	Forager	4951.27	1771.68	15900.3	651.861	3848.11	22247.2	1175.12	9082.52	25.3692	449.193	416.811	4246.88	51.8151	1368.61	1434.15	2692.44	593.405	3310.94	301.873	74519.6
SCC_O_F07	Forager	1215.98	834.215	5837.43	487.74	2922.15	25514.2	1902.4	13511.4	71.1017	395.517	501.775	2604.95	50.4381	962.815	785.647	1535.25	520.895	2169.86	215.822	62039.6
SCC_O_F08	Forager	4269.74	2435.6	14243.8	563.843	5994.69	21639.7	1481.5	6303.23	63.2194	284.185	287.981	2601.07	95.2404	999.913	857.505	1712.64	546.605	2487.07	242.636	67110.2
SCC_O_N01	Nurse	4620.4	78.8816	499.408	62.4536	117.911	1517.06	89.3176	3750.32	202.892	189.096	580.848	3915.1	122.449	3679.41	3454.71	5413.11	4057.83	13927.2	1370.01	47648.4
SCC_O_N02	Nurse	3583.06	74.2844	660.133	63.9666	142.404	2767.9	160.727	7832.64	407.285	320.971	758.498	6670.05	406.357	4705.04	4074.79	5837.36	4145.24	13762.7	1035.11	57408.5
SCC_O_N03	Nurse	3590.15	108.38	694.084	62.7291	244.732	2201.09	156.355	4091.96	257.655	177.665	566.863	3781.51	135.61	3503.21	3212.29	4491.94	3023.7	12591.8	999.465	43891.2
SCC_O_N04	Nurse	4680.52	96.724	691.154	60.0625	172.285	1915.45	122.54	4875.71	178.412	209.9	600.461	4505.35	139.676	4128.97	3333.02	4637.18	3624.4	13325.5	900.632	48198
SCC_O_N05	Nurse	5911.45	124.035	729.191	70.8715	174.459	2032.37	123.911	3643.21	185.639	149.021	538.488	3196.82	133.322	3683.2	3026.61	3644.08	3650.08	11742.6	774.568	43534
SCC_O_N06	Nurse	2368.63	52.0657	569.964	57.2433	118.072	1842.44	109.21	5157.2	259.01	169.189	525.153	3700.32	213.773	3131.2	2781.9	3953.45	3645.71	12060.9	903.062	41618.5
SCC_O_N07	Nurse	11019.8	192.736	1079.99	86.8053	236.716	2320.04	214.709	4869.82	217.671	273.952	916.837	6557.89	144.753	4963.15	4775.34	6681.45	3847.81	11244.5	742.208	60386.2
SCC_O_N08	Nurse	1108.96	44.3562	509.26	46.9557	154.651	1669.71	121.625	3066.3	154.143	150.855	544.851	3431.16	121.938	3234.98	3454.65	5108.08	3961.82	11327.6	850.152	39062.1

## Sheet: Undertaker (2D)
	task	C18:1	C23:1	C23	C24	C25:1	C25	C27:1	C27	11,13 methyl C27	C28	C29:1	C29	11,13 methyl C29	z(7) C31:1	z(9) C31:1	C31	C33:2	C33:1	C33	sum
F1	Forager	5928.48	1454.62	16643.9	794.837	3742.24	31938.4	1375.25	7556.78	101.836	153.559	141.13	2438.37	785.592	779.357	569.093	1259.94	169.413	1782.3	155.249	77770.4
F2	Forager	3661.08	1050.74	14234	719.24	2529.39	32935.9	1186.75	10041.7	140.018	151.646	453.73	2336.12	845.011	784.222	475.697	1022.52	296.545	1568.96	135.309	74568.6
F3	Forager	244.998	1041.8	9595.02	396.999	2155.81	10889.5	541.884	4278.49	47.5246	135.796	166.532	2370.29	760.767	480.447	308.833	1826.44	128.717	1149.86	242.789	36762.5
F4	Forager	13462.3	1053.88	8887.86	544.834	1771.19	21968.2	1142.51	14503.5	145.902	249.297	733.097	4381.22	766.018	1119.7	847.081	2413.18	429.129	2675.53	351.99	77446.5
F5	Forager	4568.46	1081.41	16250.3	706.553	1870.84	28376.4	947.893	12827.7	84.6074	185.245	182.584	2677.98	678.113	622.557	522.955	1813.71	134.343	1626.65	220.452	75378.8
F6	Forager	6656.42	551.527	6438.75	361.598	1011.98	14643.2	726.939	9509.76	566.166	185.02	569.262	2697.34	664.686	879.557	575.835	1411.98	459.576	1784.74	192.842	49887.2
F7	Forager	8738.02	981.83	6954.81	500.658	1994.93	20543.8	1359.66	14340.2	103.838	218.947	881.48	3284.51	764.731	1120.87	748.893	1589.94	399.234	2159.91	209.566	66895.9
F8	Forager	5977.44	489.683	5001.5	338.829	1600.96	14767.1	823.06	6221.86	203.973	113.421	412.683	2021.51	794.37	786.01	583.85	1766.14	377.087	1856.07	324.163	44459.7
N1	Nurse	9869.36	284.77	1911.81	113.353	643.094	3699.01	445.93	4971.52	292.353	150.957	900.141	3198.15	815.185	2702.66	1469.1	2018.36	1085.66	4024.15	411.828	39007.4
N2	Nurse	5377.62	193.181	1205.12	82.0286	442.688	2680.29	337.11	5856.82	284.522	248.766	1041.85	5837.84	1004.94	3851.62	2426.54	3553.94	1872.15	6330.41	473.935	43101.4
N3	Nurse	4772.62	618.467	5444.76	359.473	2109.67	14876.2	1201.96	7176.61	175.359	122.216	486.286	1989.68	856.507	1192.45	750.551	1441.28	534.753	2452.21	229.757	46790.8
N4	Nurse	4241.7	122.804	2301.52	100.561	269.486	3468.65	151.244	10502.9	503.863	288.783	821.837	6715.18	966.983	5020.06	4025.57	4779.45	2276.48	16305.5	687.917	63550.5
N5	Nurse	4913.86	130.379	790.639	53.1965	167.303	1388.47	105.411	4365.21	663.22	134.716	470.456	2694.59	829.665	3154.24	2038.35	1782.34	1794.34	6724.08	259.236	32459.7
N6	Nurse	6288.69	104.017	683.797	42.074	144.419	1039.31	81.6441	3942.19	465.497	175.932	378.161	3029.98	998.096	2899.88	2081.14	2695.98	2695.72	11227.9	752.852	39727.3
N7	Nurse	1714.08	120.888	993.434	58.6143	306.023	1866.79	163.218	5227.16	940.218	191.787	606.482	3934.24	911.183	2844.7	2239.17	3351.3	2101.22	7033.84	539.919	35144.3
N8	Nurse	2065.42	316.501	2714.19	152.246	781.789	4553.48	530.772	6308.73	241.159	220.905	1014.91	5030.21	912.654	3007.76	1640.14	2734.44	993.61	4062.84	408.738	37690.5
U1	Undertaker	7338.99	438.138	2916.05	178.206	1030.61	6518.03	958.509	10369.4	283.645	149.268	1123.97	2743.95	783.98	2053.06	1063.35	1426.76	684.497	3831.92	246.062	44138.3
U2	Undertaker	8113.15	257.669	2042.14	112.461	538.722	3585.03	355.899	5080.12	316.001	194.226	995.04	4410.82	981.678	3979.96	2509.77	2802.98	1978.24	5738.65	434.713	44427.3
U3	Undertaker	13198.8	545.141	3333.8	231.614	1349.01	9668.49	1648.91	12161	246.654	158.355	1006.3	2375.2	743.502	1967.38	1198.26	1196.4	1010.73	3545.98	171.182	55756.7
U4	Undertaker	12646.8	202.336	1134.14	81.2451	447.628	2829.96	319.141	3982.87	258.286	149.964	679.437	3116.27	976.563	3496.71	2323.47	2696.44	2614.3	6992.78	608.591	45556.9
U5	Undertaker	10323.6	485.885	3653.04	223.48	913.596	7448.06	1106.71	12798.5	260.145	238.989	1096.87	4115.07	840.791	2321.29	1404.73	2883.75	894.391	4445.74	583.013	56037.7
U6	Undertaker	3500.59	826.654	8386.35	400.983	1880.05	17874.7	1241.47	10898.9	220.292	174.846	683.87	2416.5	660.107	1234.47	771.463	1022.99	466.413	2575.8	105.969	55342.4
U7	Undertaker	2959.32	90.2314	807.278	59.8167	294.482	1980.59	167.366	3678.95	219.491	133.399	544.84	3318.81	907.915	3500.05	2363.9	2848.63	2596.73	7061.62	519.076	34052.5
U8	Undertaker	14841.1	369.078	2165.88	122.383	713.465	3964.64	462.813	4927.45	257.052	189.234	856.208	4696.94	949.916	4081.43	2638.88	3556.51	1968.15	6445.83	606.405	53813.3

## Sheet: Big-back (2E)
	group	C18:1	C23:1	C23	C24	C25:1	C25	C27:1	C27	11,13 methyl C27	C28	C29:1	C29	11,13 methyl C29	z(7) C31:1	z(9) C31:1	C31	C33:2	C33:1	C33	sum
BB_F1_001	Forager	4438.9	114.025	635.756	33.5946	111.714	1154.5	54.7954	4990.66	671.417	186.73	528.025	5856.21	609.546	4650.63	3518.5	5403.03	1123.45	20235	923.261	55239.7
BB_F1_002	Forager	995.226	76.4088	666.129	33.4038	96.5953	1016.32	51.4093	4375.5	619.693	164.071	514.061	4847.88	580.243	4440.67	3367.7	3539.95	651.594	14688.6	398.11	41123.6
BB_F1_003	Forager	3994.47	119.477	577.998	33.121	122.554	1108.08	66.1935	4661.08	623.104	178.103	516.292	5373.57	580.521	3852.04	3165.3	4411.87	1237.75	13708.3	605.406	44935.3
BB_F1_004	Forager	2499.52	129.599	826.843	41.0695	162.554	1348.57	80.7462	5472.85	588.619	273.48	775.096	9316.43	578.84	6069.17	5211.24	8282.61	1325	17442.6	997.446	61422.3
BB_F1_005	Forager	10420.5	161.189	795.424	38.2932	107.492	1365.93	53.8738	6642.09	539.471	218.001	678.027	6858.46	543.405	5244.79	3695.41	5156.56	843.047	19067.8	752.232	63182
BB_F1_006	Forager	4519.48	130.899	983.506	48.7971	125.407	1671.39	67.1866	10079.2	1121.24	318.079	580.134	10186.2	623.216	4224.56	4104.89	10860	735.62	23451.2	1759.47	75590.4
BB_F1_007	Forager	3031.28	173.189	1279.43	53.4845	248.321	1628.66	97.9091	5677.54	810.262	253.394	4271.8	7623.09	734.504	6290.7	4974.08	5216.47	1060.23	16071.7	591.038	60087.1
BB_F1_008	Forager	2422.36	166.882	965.511	48.0893	181.75	1573.23	91.5619	6548.35	1280.99	261.434	938.1	7865.04	984.418	6490.26	5147.43	6610.41	1369.7	21146.8	1036.04	65128.3
BB_N1_001	Big-back	4054.97	178.009	1463.77	82.6095	230.736	2977.32	141.519	13031.5	1528.83	317.179	1108.76	9455.06	863.869	6735.72	5309.09	7360.2	1759.95	25746	962.192	83307.3
BB_N1_002	Big-back	4440.09	144.093	961.043	60.0871	140.153	2342.27	81.2474	15804.4	1045.99	429.263	921.718	11850.7	582.934	5162.18	4607.19	9548.68	932.61	16172.9	1085.68	76313.2
BB_N1_003	Big-back	1811.57	196.529	1794.7	92.2265	337.845	3426.34	203.299	11467.1	1689.74	357.007	1015.71	9162.61	1184.46	6111.64	5315.45	7798.55	2197.57	17720	910.272	72792.6
BB_N1_004	Big-back	1379.3	107.457	809.878	42.5237	133.031	1432.75	79.5942	7089.15	1095.01	292.078	684.983	9308.62	499.442	4579.19	3902.72	6610.12	1075.04	15991.3	744.898	55857.1
BB_N1_005	Big-back	1848.2	805.583	4859.75	542.416	2468.27	22586.7	2269.31	30076.3	1467.97	442.098	1662.74	8785.51	967.475	4315.5	3713.01	6068.05	1433.97	15395.3	821.879	110530
BB_N1_006	Big-back	5456.22	197.446	1481.52	75.1473	286.232	2847.27	118.386	12003.8	1425.1	328.273	953.669	10052.8	772.122	6484.52	4907.4	7842.21	1414.82	21591.5	1158.53	79396.9
BB_N1_007	Big-back	2917.69	158.242	1335.28	117.73	154.594	5263.38	129.499	21228.9	1250.24	335.422	1040.49	9528.92	785.591	5472.06	3570.42	5181.28	898.873	17941.3	538.594	77848.6
BB_N1_008	Big-back	3508.9	219.434	3083.01	120.612	394.445	4071.49	220.033	12921.9	1821.43	379.603	1074.35	9264.27	1157.66	7593.18	6013.57	7129.13	2107.75	25705.4	1056.39	87842.5

## Sheet: Reversion (2F)
	task	C18:1	C23:1	C23	C24	C25:1	C25	C27:1	C27	11,13 methyl C27	C28	C29:1	C29	11,13 methyl C29	z(7) C31:1	z(9) C31:1	C31	C33:2	C33:1	C33	sum
R_F1_001	Forager	7535.8	1061.49	8375.8	513.373	2807.84	24880	1811.91	13785.2	67.1512	163.689	774.07	3165.41	48.1587	791.663	695.715	2117.4	140.341	2361.93	246.571	71343.6
R_F1_002	Forager	5622.29	431.326	2737.84	158.704	874.794	5569.08	596.751	12752	789.796	299.757	732.084	6918.45	75.6512	1460.59	1405.21	4804.83	608.149	4610.09	642.823	51090.2
R_F1_003	Forager	4419.36	856.966	9908.41	663.485	2720.65	33143.1	1821.93	13897.3	65.1024	109.414	576.326	1688.03	63.975	663.561	561.664	992.578	104.01	1923.54	108.18	74287.6
R_F1_004	Forager	3256.82	896.642	7331.88	515.789	2662.03	21737.5	1827.37	11769.5	559.815	153.004	800.439	3070.6	63.3579	866.287	715.978	1415.92	222.577	2074	117.151	60056.6
R_F1_005	Forager	6496.29	1057.09	5387.54	345.618	2520.32	14075.3	2282.34	22532.2	79.1679	341.746	1971.86	5622.1	68.7483	1124.91	842.699	1731.57	411.924	2296.91	163.246	69351.6
R_F1_006	Forager	7197.59	850.998	6822.6	530.761	2355.74	26093.4	2106.48	27450.8	485.451	396.495	1653.79	6269.99	72.1281	1196.71	1129.14	3326.76	370.553	3122.59	385.048	91817
R_F1_007	Forager	2172.84	403.012	3345.82	317.678	967.692	15419.4	985.199	29076.2	96.8091	295.874	921.253	6238.46	111.461	1278.79	977.29	2799.24	601.249	2804.99	231.42	69044.7
R_F1_008	Forager	4452.02	682.147	4627.1	300.046	1854.38	13008.4	2246.02	18293.9	886.261	229.968	1333.44	2951.71	89.4397	956.531	718.189	1607.33	357.027	2721.63	251.734	57567.3
R_N1_001	Nurse	7204.12	1339.91	8978.51	739.088	4122.04	34849	3513.05	22038.7	91.9463	184.462	1498.77	3226.52	109.329	1108.7	915.52	1917.74	352.405	3103.3	210.033	95503.1
R_N1_002	Nurse	2108.3	1105.28	11206.6	683.251	2909.2	31874.8	1918.05	18066.6	262.806	243.738	1031.34	4674.52	104.183	1318.67	1231.88	2741.82	434.861	3855.81	314.099	86085.8
R_N1_003	Nurse	6093.71	1049.9	8663.51	547.349	2563.27	25046.1	1757.5	15686.2	124.48	248.416	996.831	5067.42	74.9302	1094.48	994.456	3015.52	359.953	2956.54	368.418	76709
R_N1_004	Nurse	3589.87	462.826	3071.98	170.709	1004.18	6016.01	688.862	8270.84	125.035	227.221	667.415	5967.17	100.078	1948.45	1823.36	4554.44	769.5	7588.57	747.365	47793.9
R_N1_005	Nurse	1396.67	1880.5	12857	700.516	3614.38	26047.9	1980.45	12624.3	149.948	161.135	979.134	2974.87	105.167	1305.01	1065.74	1879.22	463.037	4054.36	241.265	74480.6
R_N1_006	Nurse	5022.61	292.12	1002.98	73.0556	384.142	2211.94	273.6	5758.66	233.122	178.64	494.615	5781.69	142.014	2246.95	2050.95	6499.88	1072.38	12503.7	1515.87	47739
R_N1_007	Nurse	7367.17	849.221	7472.84	388.185	2007.38	14636.8	1691.01	25376.8	280.472	490.363	1807.71	8534.55	143.46	2049.8	1784.43	4100.56	661.046	4752.03	427.227	84821
R_N1_008	Nurse	323.951	770.409	5846.7	586.107	2492.67	29347.1	3294.75	38603.6	160.221	349.085	1925.62	5975.34	124.705	1510.92	1157.93	2844.93	608.707	3932.68	381.963	100237

## Sheet: Supplement 1
	colony	C18:1	C23:1	C23	C24	C25:1	C25	C27:1	C27	11,13 methyl C27	C28	C29:1	C29	11,13 methyl C29	z(7) C31:1	z(9) C31:1	C31	C33:2	C33:1	C33	sum
14EF_001	1	4162.35	354.081	4350.37	242.838	1074.21	16107	1313.28	12494.5	111.56	419.19	477.53	2686.08	93.9675	706.515	529.874	2061.49	253.078	2223.03	339.084	50000
14EF_002	1	1524.34	299.911	1985.33	151.705	888.598	9217.34	1160.45	12815.8	242.901	389.626	769.801	3012.57	193.842	1355.82	1004.95	2538.61	624.957	4394.81	473.591	43045
14EF_003	1	10130	610.402	7186.01	479.75	1468.23	34847.6	1361.88	21432.9	144.036	467.916	526.895	3191.13	121.302	800.164	621.292	2058.04	353.021	2666.31	250.691	88717.5
14EF_004	1	3853.61	342.344	2079.68	157.607	781.155	8318.63	1021.26	10482.4	152.841	559.055	480.599	3650.6	109.136	902.617	833.765	3457.02	258.031	3150.49	686.628	41277.5
14EF_005	1	12661.5	1693.1	30285.4	1062.11	3644.65	37531.1	2728.94	11107.2	327.271	623.701	1198.71	2258.99	198.701	1243.99	957.471	1758.49	571.369	4419.07	277.984	114550
14EF_006	1	4542.46	571.651	5924.86	259.952	1041.65	10125.1	922.681	6685.75	107.164	394.748	362.275	1830.69	99.3872	593.469	459.482	1432.82	193.798	2080	240.182	37868.1
14EF_007	1	1402.66	380.744	4195.71	274.161	1180.02	12155.4	1268.2	8736.57	102.461	379.619	468.486	1644.6	78.4487	589.878	530.679	2144.87	216.181	2695.61	603.837	39048.1
14EF_008	1	6301.1	1215.71	15922.5	573.324	2097.09	20689.4	1283.1	6718.9	134.709	131.49	626.995	1596.08	98.118	757.089	780.301	830.504	284.27	2161.84	92.6872	62295.2
14HF_001	2	5416.49	310.656	1599.78	119.323	532.162	3550.6	377.121	6198.83	491.341	432.285	724.76	3506.74	329.707	2231.96	1575.61	2833.35	1470.2	5481.83	541.892	37724.6
14HF_002	2	3683.07	183.354	1514.39	92.8233	378.859	3150.54	311.993	6514.14	1070.67	451.862	588.85	3391.23	511.288	1872.98	1491.6	2732.79	1882.63	5507.4	521.566	35852
14HF_003	2	1469.35	464.13	2335.7	177.18	1323.5	7241.58	1268.82	9049.62	292.45	641.29	941.545	3872.35	144.277	1723.85	1212.26	2422.74	645.244	4358.07	392.679	39976.6
14HF_004	2	7763.57	518.736	2377.93	185.471	875.638	6487.03	1170.61	9886.75	526.515	793.401	1365.19	4873.39	299.579	2286.24	1802.11	3835.77	1058.63	5547.71	689.581	52343.9
14HF_005	2	8201.43	372.958	1833.84	115.559	465.409	3605.02	429.321	7399.29	850.111	292.886	908.373	5130.86	366.84	2542.38	2012.6	4064.17	1797.41	6009.55	846.217	47244.2
14HF_006	2	7986.97	317.356	1546.37	133.47	533.944	5243.46	872.47	8766.08	249.202	443.087	1185.15	4024.7	180.225	1883.83	1291.41	1915.12	828.012	4412.96	281.037	42094.9
14HF_007	2	6859.02	447.147	2372.23	184.486	1104.04	7495.97	1174.74	7407.64	335.305	668.558	577.387	3969.77	214.655	1329.24	1264.69	3064.49	508.52	4201.96	440.458	43620.3
14HF_008	2	644.227	668.873	3298.86	246.518	1864.24	10485.2	1394.74	8123.61	252.86	530.717	495.518	2319.35	174.803	1107.15	889.122	1501.8	682.781	3597.94	216.836	38495.1
