# Supplementary material for: The cuticular hydrocarbon profiles of honey bee workers develop via a socially-modulated innate process
Source: eLife. 2019 Feb 5;8:e41855. doi: 10.7554/eLife.41855 (PMC6382352; doi:10.7554/eLife.41855)
Supplement: Figure 3—source data 1. [file elife-41855-fig3-data1.xlsx]

## Sheet: Day7 (3A)
	Group	Source colony	Foster colony	C18:1	C23:1	C23	C24	C25:1	C25	C27:1	C27	11,13 methyl C27	C28	C29:1	C29	11,13 methyl C29	z(7) C31:1	z(9) C31:1	C31	C33:2	C33:1	C33	sum
7EE_001	Colony 1 bee raised in colony 1	1	1	2097.2	72.6166	464.741	48.8614	113.317	1307.37	95.3147	4174.91	546.612	210.62	596.11	6136.68	344.059	4543.15	4533.47	7699.6	1741.35	15416.3	1240.19	51382.5
7EE_002	Colony 1 bee raised in colony 1	1	1	2807.81	119.002	1010.08	60.5325	129.056	2206	95.5002	6485.55	1372.08	170.088	380.832	3410.13	1106.27	2009.7	1848.83	6181.9	1778.72	12058.8	3277.84	46508.7
7EE_003	Colony 1 bee raised in colony 1	1	1	2309.62	77.4107	818.988	48.6176	89.8315	1331.33	61.4768	4371.85	593.3	252.353	635.977	7658.25	470.158	4929.33	5408.75	9278.5	1078.16	18446.8	1361.62	59222.3
7EE_004	Colony 1 bee raised in colony 1	1	1	4060.12	94.6856	510.475	47.8679	90.4743	986.683	69.8765	3256.03	622.244	113.753	353.786	2689.52	478.978	2132.74	2236.11	5287.47	1535.7	15672.2	1673.13	41911.9
7EE_005	Colony 1 bee raised in colony 1	1	1	1235.76	47.3443	513.828	41.6642	80.2882	961.916	63.9996	3895.52	683.785	125.959	507.52	2999.07	571.338	3540.91	2777.37	2745.21	3302.72	11136.3	446.276	35676.8
7EE_006	Colony 1 bee raised in colony 1	1	1	7454.57	141.965	729.965	58.2358	113.491	1275.67	86.1429	3891.58	867.446	125.259	344.916	2651.23	643.55	2031.06	1939.29	4703.89	2214.03	14057.6	1905.03	45234.9
7EE_007	Colony 1 bee raised in colony 1	1	1	788.324	36.978	592.373	43.0323	97.7806	892.183	72.8201	2556.88	727.423	108.62	346.597	2691.14	580.051	1826.72	2104.67	7458.98	1509.19	14768.2	3339.04	40541
7EE_008	Colony 1 bee raised in colony 1	1	1	382.736	46.0769	445.495	38.541	123.815	753.348	78.5932	1938.97	897.976	82.8694	399.79	1839.31	581.19	1991.24	2033.36	3448.44	2419.2	14529.1	1271.74	33301.8
7EH_001	Colony 2 bee raised in colony 1	2	1	422.73	28.546	925.337	85.4123	69.9916	3258.13	133.037	15120.1	416.54	599.285	596.616	7359.84	380.265	3665.65	2934.67	6643.64	816.943	23276.4	1168.63	67901.8
7EH_002	Colony 2 bee raised in colony 1	2	1	3198.04	89.2124	552.652	65.6527	108.914	1232.54	220.232	3999.81	633.965	1473.81	512.832	3491.05	508.574	3507.2	3323.91	5355.17	3841.28	19868.8	1700.86	53684.4
7EH_003	Colony 2 bee raised in colony 1	2	1	5371.41	138.908	568.429	53.6704	144.887	1518.8		5461.36	632.239	1631.87	687.975	4522.05	506.168	4062.82	3276.17	4410.39	2506.81	18467.4	760.912	54722.3
7EH_004	Colony 2 bee raised in colony 1	2	1	3504.27	77.2721	861.14	63.5398	106.981	1867.63	224.831	7970.31	550.573	1197.51	1110.51	5399.83	463.578	3416.47	3231.62	6011.68	1075.93	21889.3	1280.21	60303.2
7EH_005	Colony 2 bee raised in colony 1	2	1	1923	53.2044	483.762	38.7755	76.7051	987.265	174.334	4682.58	621.001	491.687	538.992	4599.45	589.684	4845.25	3916.88	4595.61	1210.21	23521.1	886.339	54235.9
7EH_006	Colony 2 bee raised in colony 1	2	1	2264.1	89.8308	657.924	54.2421	118.334	1425.74	351.609	7924.5	694.809	1337.04	817.237	6260.28	552.327	5600.95	4302.28	6078.71	1430.64	29998.2	1075.55	71034.2
7EH_007	Colony 2 bee raised in colony 1	2	1	3526.46	142.244	2055.93	108.814	163.88	3544.31	321.187	16235.8	803.227	1385.91	1397.36	13480.5	724.077	9427.06	7842.18	11292.9	2112.21	43923.4	2034.82	120522
7EH_008	Colony 2 bee raised in colony 1	2	1	3096.67	104.225	816.999	60.2535	162.805	1698.36	399.348	7735.48	805.456	940.65	767.279	5552.29	656.853	4383.97	4013.59	4561.91	1248.17	16919	688.917	54612.2
7HE_001	Colony 1 bee raised in colony 2	1	2	1656.6	63.0472	407.181	39.1035	80.713	973.377	54.8935	4644.05	452.496	166.198	360.95	4100.14	332.809	2729.02	2291.11	5659.13	820.189	17436	1218.22	43485.2
7HE_002	Colony 1 bee raised in colony 2	1	2	4615.22	124.712	611.469	67.3858	125.829	1562.97	180.688	4822.82	546.723	457.901	761.756	5735.19	450.407	3227.43	3601.62	8547.68	3498.84	14646.1	1908.74	55493.5
7HE_003	Colony 1 bee raised in colony 2	1	2	2637.44	94.9864	401.599	49.0828	120.256	1228.18	140.224	6251.22	716.912	205.297	441.379	4342.4	556.571	1765.69	1846.47	12106	1787.4	12452.3	8020.18	55163.5
7HE_004	Colony 1 bee raised in colony 2	1	2	3137.9	90.2243	684.091	67.8527	79.2022	2539.85		13334.1	578.849	262.412	647.461	7189.31	406.469	3345.21	2528	6303.67	708.889	21103.6	866.709	63873.8
7HE_005	Colony 1 bee raised in colony 2	1	2	2258.57	66.7787	496.439	62.5328	96.5838	1767.65	73.3142	7744.84	771.019	292.729	643.548	6130.59	664.321	2975.97	3352.8	11013.6	2642.65	21131	3371.44	65556.4
7HE_006	Colony 1 bee raised in colony 2	1	2	5636.98	113.652	484.57	54.206	92.9702	1140.34	61.063	2929.1	455.643	134.547	366.61	3395.82	359.986	2157.58	2269.09	7023.13	1700.78	14972.5	2305.58	45654.2
7HE_007	Colony 1 bee raised in colony 2	1	2	7016.32	155.755	526.894	49.3809	168.595	1230.83	209.363	4732.16	866.381	711.655	716.619	5168.93	542.864	3567.19	3315.25	5982.29	1869.06	17620.3	1248.64	55698.4
7HE_008	Colony 1 bee raised in colony 2	1	2	4083.37	96.9858	612.533	56.3209	108.878	1214.63	103.76	5286.77	465.664	158.596	422.706	4563.35	365.008	2278.86	2241.52	7378.94	1049.57	18444.4	1916.44	50848.2
7HH_001	Colony 2 bee raised in colony 2	2	2	2058.92	88.7756	522.562	58.8405	142.195	1542.87	237.714	5938.25	787.385	885.006	530.765	4187.62	715.639	2879.74	2680.6	5504.39	3332.1	19397.1	1523.96	53014.4
7HH_002	Colony 2 bee raised in colony 2	2	2	5359.07	99.9239	544.11	45.4418	49.9557	1458.37	92.7902	10590.6	344.52	271.239	517.3	8408.41	261.739	4255.18	3176.99	5587.39	734.195	19151.8	526.966	61476
7HH_003	Colony 2 bee raised in colony 2	2	2	5629.08	108.586	644.074	69.5054	86.3466	2079.31		12221	556.582	1738.44	729.246	7556.13	400.67	3010.84	2459.38	7397.86	1187.74	22203.5	1338.03	69416.3
7HH_004	Colony 2 bee raised in colony 2	2	2	5932.26	136.732	548.427	49.1938	121.674	1194.24	180.076	3519.77	655.498	789.268	429.028	2638.19	561.885	2712.76	2189.78	3028.73	2922.85	16424.5	807.569	44842.4
7HH_005	Colony 2 bee raised in colony 2	2	2	765.963	43.785	377.489	45.4847	99.4462	994.22	135.357	5329.3	569.05	579.107	622.624	4217.15	343.853	3749.5	2903.97	4509.16	1052.49	21383.6	880.989	48602.5
7HH_006	Colony 2 bee raised in colony 2	2	2	5541.88	138.818	1397.18	113.3	197.845	4280.23	601.97	15670.6	800.294	1279.1	1058.9	8229.53	712.425	4106.99	3517.19	8123.88	2181.23	27774.8	1567.8	87294
7HH_007	Colony 2 bee raised in colony 2	2	2	5808.74	142.924	1024.02	83.2395	156.676	2394.14	307.276	9599.87	562.286	976.275	928.925	7138.93	475.383	3842.51	3381.9	7350.66	3195.19	20465.4	1524.26	69358.6
7HH_008	Colony 2 bee raised in colony 2	2	2	2353.12	143.381	1779.88	154.107	283.137	6161.18	596.568	23457.2	800.193	1502.56	1370.31	11747.2	759.148	5271.64	5165.28	12169.9	1916.27	32028.3	2484.31	110144

## Sheet: Day14 (3B)
	Group	Source colony	Foster colony	C18:1	C23:1	C23	C24	C25:1	C25	C27:1	C27	11,13 methyl C27	C28	C29:1	C29	11,13 methyl C29	z(7) C31:1	z(9) C31:1	C31	C33:2	C33:1	C33	sum
14EE_001	Colony 1 bee raised in colony 1	1	1	9861.06	133.475	684.869	45.8464	90.3347	1304.68	104.24	4776.48	436.451	261.248	576.134	7209.61	321.353	4055.8	4573.21	8776.96	2194.64	16661.2	1608.16	63675.8
14EE_002	Colony 1 bee raised in colony 1	1	1	6074.11	114.665	526.07	47.4984	186.494	1818.05	218.642	4633.41	622.4	175.783	483.512	3513.52	395.391	2449.85	2480.25	8547.55	3026.89	13017	4324.62	52655.8
14EE_003	Colony 1 bee raised in colony 1	1	1	3497.43	88.0038	430.747	38.9125	135.013	1066.05	168.759	2888.25	450.615	133.362	552	2498.31	322.561	2863.86	2711.29	3917.04	3912	15489.9	1192.39	42356.5
14EE_004	Colony 1 bee raised in colony 1	1	1	11951.4	213.225	701.248	43.7938	130.931	1038.96	108.297	3344.59	471.258	146.425	523.907	3701.49	372.834	4563.4	4113.2	3859.22	1908.36	19052.8	594.395	56839.7
14EE_005	Colony 1 bee raised in colony 1	1	1	3929.34	97.493	636.671	48.7228	167.896	1814.32	220.227	4481.36	375.893	154.451	533.565	3699.37	285.109	2787.84	2672.32	5946.55	1884.08	12715.8	1492.12	43943.1
14EE_006	Colony 1 bee raised in colony 1	1	1	7585.23	148.936	573.718	45.1428	157.303	1500.49	199.222	4460.39	729.791	174.245	649.186	4641.43	501.437	4982.87	4407.43	5770.95	3460.83	18677.9	986.009	59652.5
14EE_007	Colony 1 bee raised in colony 1	1	1	10736.8	139.142	748.118	50.0182	99.5563	1312.58	95.3245	3846.25	408.326	258.875	644.39	6666.82	320.542	4901.52	5482.35	7247.79	2736.39	13957.5	947.971	60600.3
14EE_008	Colony 1 bee raised in colony 1	1	1	4734.49	91.6978	492.259	42.8051	123.26	1002.68	263.429	3194.97	618.98	115.912	369.474	2715.05	445.366	1975.58	2044.95	6744.11	2054.41	11380.3	3965.31	42375.1
14EH_001	Colony 2 bee raised in colony 1	2	1	4386.76	357.016	2519.74	161.353	911.948	6898.87	1213.54	31773.4	807.803	1299.66	2808.94	19699.6	557.015	6395.19	5732.41	20257.8	2117.07	23937.2	3813.49	135649
14EH_002	Colony 2 bee raised in colony 1	2	1	5899.74	119.272	446.922	62.6603	147.685	1005.31	224.802	3236.68	579.481	1202.17	677.303	4808.82	366.852	4595.33	3952.76	5220.83	2478.05	14652.6	979.705	50656.9
14EH_003	Colony 2 bee raised in colony 1	2	1	6156.41	167.352	1123.78	77.0221	189.653	2199.74	390.603	8346.44	511.474	1052.72	1186.3	9426.81	367.849	6029.45	4994.97	7531.4	2515.97	21782	1137.05	75187
14EH_004	Colony 2 bee raised in colony 1	2	1	2688.05	134.885	1066.17	72.339	341.2	2030.46	506.693	5955.98	491.738	947.346	782.975	6926.21	389.042	3868.83	3750.24	8020.6	2023.25	17139.5	1587.84	58723.4
14EH_005	Colony 2 bee raised in colony 1	2	1	6481.39	203.912	1102.81	74.8344	350.807	2611.42	469.6	5275.25	521.977	675.791	875.132	4784.91	415.592	4652.86	4114.28	4836.4	3670.58	15375.1	954.56	57447.2
14EH_006	Colony 2 bee raised in colony 1	2	1	3886.55	218.045	1742.43	96.2676	491.891	3261.02	717.416	6078.65	450.56	1003.59	1347.82	6194.17	303.259	5430.97	4200.23	5442.06	2211.38	11549.7	1158.05	55784.1
14EH_007	Colony 2 bee raised in colony 1	2	1	6390.71	112.139	535.945	45.4713	139.237	1297.8	322.971	3664.6	393.966	424.178	570.652	3043.21	319.108	3483.34	3282.85	3849.7	4622.89	14010	983.052	47491.9
14EH_008	Colony 2 bee raised in colony 1	2	1	6146.86	234.366	1345.58	82.2236	457.292	2783.08	752.09	5414.75	463.137	1411.85	951.565	5052.83	299.926	4485.45	3651.81	4633.5	2525.11	10509.7	839.658	52040.8
14HE_001	Colony 1 bee raised in colony 2	1	2	5224.13	127.281	469.301	54.1012	147.016	1420.66	102.963	3842.81	440.782	209.557	503.049	4098.15	326.416	2883.44	3035.3	8176.47	3472.57	13448.6	2107.91	50090.5
14HE_002	Colony 1 bee raised in colony 2	1	2	1691.21	106.422	987.182	82.5452	276.513	2689.26	267.708	10438.1	433.986	437.571	1371.94	11740.5	335.154	6562.84	5317.3	8657.69	2020.32	14693.9	1106.81	69217
14HE_003	Colony 1 bee raised in colony 2	1	2	10210.8	233.449	626.36	56.7618	205.967	1430.99	186.85	3563.51	461.776	175.515	568.82	2984.02	360.295	2884.37	2668.84	5577.92	3410.35	15527.7	1291.66	52425.9
14HE_004	Colony 1 bee raised in colony 2	1	2	0	74.0096	568.128	60.8065	170.364	1392.02	199.292	3217.22	517.831	123.707	459.653	1942	353.772	1679.49	1502.32	3415.68	1817.2	7919.91	1522.48	26935.9
14HE_005	Colony 1 bee raised in colony 2	1	2	21185.5	392.618	529.614	50.6965	143.902	1364.38	178.492	4439.36	506.747	210.696	634.215	5045.61	318.569	3393.58	3680.24	8145.28	2524.62	15971	1637.27	70352.3
14HE_006	Colony 1 bee raised in colony 2	1	2	6419.84	258.167	1159.25	88.9458	365.139	2563.73	308.484	5655.64	592.427	197.809	661.574	4558.25	694.746	2653.94	2483.21	8066.54	3576.87	12276.2	2895.35	55476.1
14HE_007	Colony 1 bee raised in colony 2	1	2	7144.3	229.274	704.235	60.0907	278.699	1582.12	283.062	4069.19	588.608	216.034	723.498	5209.25	431.671	3821.81	3379.56	6235.56	3379.14	10103.6	1157.95	49597.6
14HE_008	Colony 1 bee raised in colony 2	1	2	2189.17	148.789	1114.64	94.2361	256.453	3337.2	292.487	12107.1	406.541	351.528	763.137	8204.71	359.512	2709.16	3125.94	11970.6	1928.18	14783	3586.65	67728.9
14HH_001	Colony 2 bee raised in colony 2	2	2	6331.53	272.892	1707.44	114.377	487.124	3335.03	793.003	8420.24	840.281	769.891	2049.54	4864.04	559.353	4497.63	3529.29	3313.96	2557.7	10999.7	570.482	56013.5
14HH_002	Colony 2 bee raised in colony 2	2	2	9477.5	259.335	1243.51	94.3388	384.84	2619.18	307.18	6864.43	983.686	376.895	893.475	6064.95	673.095	4479.92	4189.15	6487.77	3456.21	15233.3	1339.99	65428.7
14HH_003	Colony 2 bee raised in colony 2	2	2	6554	202.516	1101.9	103.222	270.077	3300.82	309.34	11719	633.678	1060.05	806.582	9072.97	445.868	3711.41	3916.61	11174.1	2066.3	18784.6	2556.97	77790.1
14HH_004	Colony 2 bee raised in colony 2	2	2	8515.44	179.025	793.53	65.2362	263.331	1802.62	281.652	4382.5	586.17	789.615	725.369	4344.24	425.444	4066.25	3980.06	6704.11	3605.24	21095.6	2116.68	64722.1
14HH_005	Colony 2 bee raised in colony 2	2	2	7229.82	189.716	824.985	65.7227	235.163	1573.5	382.094	6641.95	513.906	1187.99	963.918	7622.96	366.826	5004.63	4106.35	5433.57	1505.51	15970.9	677.207	60496.7
14HH_006	Colony 2 bee raised in colony 2	2	2	7584.83	166.042	1129.95	96.0449	225.648	2113.83	330.555	5496.31	466.628	563.203	784.822	6084.71	354.245	4226.15	3675.58	5917.41	2613.93	15489.1	1161.05	58480
14HH_007	Colony 2 bee raised in colony 2	2	2	8248.39	226.85	765.264	71.8469	287.138	1883.39	300.539	5398.78	529.67	312.81	970.363	5081.39	402.008	4295.28	4053.24	5716.9	4440.48	16112.6	1445.04	60542
14HH_008	Colony 2 bee raised in colony 2	2	2	6037.24	199.102	1304.82	114.092	363.387	3703.19	437.338	8814.68	624.916	1071.88	1004.13	8985.85	467.343	4803.01	4755.14	10412.5	2274.36	18298.5	2323.22	75994.7

## Sheet: Forager (3C)
	Group	Source colony	Foster colony	C18:1	C23:1	C23	C24	C25:1	C25	C27:1	C27	11,13 methyl C27	C28	C29:1	C29	11,13 methyl C29	z(7) C31:1	z(9) C31:1	C31	C33:2	C33:1	C33	sum
18EE_001	Colony 1 bee raised in colony 1	1	1	10221.7	387.103	2591.51	159.585	885.987	6564.87	1088.15	8332.09	563.216	219.448	1025.78	3748.22	301.866	1630.38	1637.08	5697.82	1312.25	5852.07	1880.84	54100
18EE_002	Colony 1 bee raised in colony 1	1	1	2216.69	693.718	5076.33	318.3	1645.99	13466.5	1324.67	11047.1	322.642	257.198	818.516	4520.93	221.675	1139.34	1019.33	5249.47	602.685	3506.52	1201.79	54649.4
18EE_003	Colony 1 bee raised in colony 1	1	1	7041.37	336.69	2432.65	168.7	772.665	7557.12	1728.08	18196.3	253.896	205.651	1263.33	2480.08	197.815	1395.58	1061.75	1557.38	757.602	4349.53	239.271	51995.5
18EE_004	Colony 1 bee raised in colony 1	1	1	644.751	91.2325	805.446	74.869	356.217	2276.63	415.466	4705.91	323.43	187.251	515.235	4443.34	195.21	2048.97	2010.53	6059.66	1576.01	8947.35	1372.26	37049.8
18EE_005	Colony 1 bee raised in colony 1	1	1	771.365	240.455	1916.51	126.74	657.867	4424.16	735.155	8558.15	292.434	303.739	1167.33	7528.06	205.379	2326.48	2076.79	4470.57	1098.33	5667.56	681.574	43248.6
18EE_006	Colony 1 bee raised in colony 1	1	1	7525.34	242.76	2617.15	146.595	633.234	5815.06	737.248	12165	358.745	312.107	1404.25	6976.96	210.948	2380.31	1883.98	3931.72	1070.84	5700.08	521.556	54633.8
18EE_007	Colony 1 bee raised in colony 1	1	1	2306.56	315.034	2847.48	285.493	1718.48	17792.1	2919.21	11840.3	158.931	133.704	580.495	2293.71	107.258	619.199	611.58	2387.29	224.078	2054.64	304.747	49500.3
18EE_008	Colony 1 bee raised in colony 1	1	1	4782.32	201.313	1378.74	94.2227	521.049	3108.03	535.035	5232.21	305.427	156.042	666.335	3375.06	219.256	1828.8	1641.84	3329.22	1222.13	6045.62	743.263	35385.9
18EH_001	Colony 2 bee raised in colony 1	2	1	765.037	2863.28	13522.6	521.991	4891.5	16350.8	1854.79	9027.85	246.834	501.898	802.983	3247.16	195.447	1258.55	884.005	1810.95	634.748	3968.75	245.876	63595
18EH_002	Colony 2 bee raised in colony 1	2	1	4145.96	646.876	4041.23	382.946	2280.42	19775.1	1866.74	14518.4	249.2	306.969	748.168	3537.74	180.877	1291.64	1192.49	2925.4	629.577	4256.04	587.694	63563.4
18EH_003	Colony 2 bee raised in colony 1	2	1	5383.51	833.991	11437.4	333.423	1678.19	17818.6	1302.27	11015	222.376	297.473	874.51	3663.4	177.905	1190.6	1182.26	2652.34	497.374	4482.95	460.929	65504.5
18EH_004	Colony 2 bee raised in colony 1	2	1	3807.97	722.117	3644.36	302.063	1938.94	14293.2	1755.46	17457.1	273.997	495.856	793.33	3322.28	204.032	1529.31	1252.15	2874.12	943.726	5756.6	533.163	61899.8
18EH_005	Colony 2 bee raised in colony 1	2	1	7411.69	1288.85	7910.54	499.286	3298.52	22589.3	2314.9	14122.5	416.005	343.933	1141.08	3807.3	304.444	2089.54	1895.09	2561.43	1123.65	6783.39	393.61	80295.1
18EH_006	Colony 2 bee raised in colony 1	2	1	7882.27	652.244	8070.2	427.792	1108.25	21923.9	1141.89	16300.7	253.738	465.149	1123.15	4113.89	194.304	1030.35	818.372	2260.24	473.344	3734.03	430.77	72404.6
18EH_007	Colony 2 bee raised in colony 1	2	1	5944.38	209.331	1432.31	108.074	486.477	3782.98	650.691	8062.51	366.586	254.751	1637.58	6198.23	264.298	3860.5	2527.03	3610.77	1796.13	7243.97	622.154	49058.8
18EH_008	Colony 2 bee raised in colony 1	2	1	6427.68	1114.2	7228.37	461.781	2150.65	22870.9	1770.73	22224.9	365.397	460.172	1273.25	4849.95	264.491	2152.26	1944.85	2473.32	1002.17	6339.98	368.074	85743.1
18HE_001	Colony 1 bee raised in colony 2	1	2	10275.5	642.751	3693.33	252.961	1168.78	11515.5	1508.18	15324.2	568.652	267.649	1294.84	4568.37	381.32	2712.06	2190.64	3041.21	1232.26	6718.08	448.628	67805
18HE_002	Colony 1 bee raised in colony 2	1	2	11117.5	496.631	2169.39	134.877	764.46	4787.86	586.946	6592.58	360.263	238.482	952.865	4311.94	235.659	2267.8	1878.2	3426.93	1102.16	5425.52	468.709	47318.7
18HE_003	Colony 1 bee raised in colony 2	1	2	4340.16	862.936	4271.03	268.278	1416.64	8943.16	1155.8	13556.9	256.267	348.058	1111.92	5989.25	191.679	1637.57	1403.37	4140.02	653.293	4928.14	482.485	55957
18HE_004	Colony 1 bee raised in colony 2	1	2	2414.08	353.241	2440.73	191.341	825.109	7173.19	1023.99	10445.7	292.527	221.886	1389.26	2880.43	201.599	1424.25	1091.78	2484.94	743.399	4721.18	499.262	40817.9
18HE_005	Colony 1 bee raised in colony 2	1	2	15297.4	601.687	2847.8	167.249	925.768	5634.18	931.378	9474.46	410.434	269.324	1070.89	5451.75	275.315	2151.49	1997.11	6574.65	1643.71	6345.26	1123.48	63193.3
18HE_006	Colony 1 bee raised in colony 2	1	2	4780.12	340.535	2025.29	127.353	602.238	4074.97	423.236	6650.27	557.791	317.547	1452.67	7962.92	549.694	4679.37	3994.79	7313.47	3018.31	9971.56	1236.55	60078.7
18HE_007	Colony 1 bee raised in colony 2	1	2	16881.7	530.405	2685.71	166.081	718.807	5444.88	507.218	9057.75	606.776	262.223	943.271	4986.67	350.037	2451.17	2461.16	8397.72	2336.42	10395.7	3717.93	72901.6
18HE_008	Colony 1 bee raised in colony 2	1	2	3786.84	176.507	942.742	83.6861	326.518	2333.54	248.754	4323	436.269	164.541	589.669	4166.02	592.41	2350.37	2323.33	9749.99	2733.9	10130	4128.5	49586.6
18HH_001	Colony 2 bee raised in colony 2	2	2	12630.7	532.982	2768.49	176.597	872.615	5370.24	667.191	9528.95	743.918	388.487	1772.77	6699.82	489.361	4390.64	3432.7	5337.07	3447.65	12381.7	1224.31	72856.1
18HH_002	Colony 2 bee raised in colony 2	2	2	5919.16	577.508	2680.13	154.444	1067.83	4789.66	1021.56	7883.73	503.029	206.373	1243.55	3257.42	327.274	2599.95	1964.61	2438.03	1594.26	8192.55	412.427	46833.5
18HH_003	Colony 2 bee raised in colony 2	2	2	5198.61	885.641	3328.05	181.069	1523.84	5780.26	743.086	3830.95	193.832	145.713	476.663	1540.83	133.824	834.833	577.713	1172.1	355.084	2209.6	275.45	29387.2
18HH_004	Colony 2 bee raised in colony 2	2	2	10731.3	1964.01	8773.07	452.87	4146.31	13671.7	1660.48	8185.93	694.052	204.801	908.156	2738.33	465.13	2615.2	2059.31	2071.18	1604.25	8376	388.249	71710.3
18HH_005	Colony 2 bee raised in colony 2	2	2	12654.9	2177.96	11253.7	508.954	4338.64	17770.9	1299.94	7590.36	279.696	265.772	468.429	2246.46	202.998	1027	791.824	1820.54	494.665	4042.3	271.726	69506.8
18HH_006	Colony 2 bee raised in colony 2	2	2	10458.9	1372.28	6169.74	296.427	2335.04	9666.25	1108.73	9625.16	461.609	249.249	727.637	4661.3	323.009	1914.23	1673.44	4509.8	1190.89	9235.98	913.316	66893
18HH_007	Colony 2 bee raised in colony 2	2	2	7698.71	921.88	3899.66	240.552	1828.13	7932.49	1392.51	7227.59	652.061	1025.18	1136.36	3244.59	406.95	2388.41	1794.03	2566.52	1662.52	6927.37	456.321	53401.8
18HH_008	Colony 2 bee raised in colony 2	2	2	1156.4	842.956	3948.85	209.752	1770.75	8446.29	934.745	5384.45	247.709	533	529.828	1905.71	207.958	1117.59	830.453	1386.46	698.98	3122.42	208.14	33482.4
