# Supplementary material for: The cuticular hydrocarbon profiles of honey bee workers develop via a socially-modulated innate process
Source: eLife. 2019 Feb 5;8:e41855. doi: 10.7554/eLife.41855 (PMC6382352; doi:10.7554/eLife.41855)
Supplement: Figure 4—source data 1. [file elife-41855-fig4-data1.xlsx]

## Sheet: All_Fold_diff
gene	group	Ct
GB51249	Day 1	18.8646
GB51249	Day 1	19.0082
GB51249	Day 1	19.2711
GB51249	Day 1	20.9297
GB51249	Day 7	17.9859
GB51249	Day 7	18.3669
GB51249	Day 7	18.3879
GB51249	Day 7	18.5205
GB51249	Day 14	19.281
GB51249	Day 14	17.222
GB51249	Day 14	19.2618
GB51249	Day 14	18.1551
GB51249	Forager	17.7503
GB51249	Forager	18.2887
GB51249	Forager	18.3376
GB51249	Forager	18.3635
GB51249	Fostered	16.9754
GB51249	Fostered	18.3354
GB51249	Fostered	19.0183
GB51249	Fostered	19.1111
LOC409638	Day 1	18.0647
LOC409638	Day 1	18.243
LOC409638	Day 1	18.6072
LOC409638	Day 1	20.1226
LOC409638	Day 7	17.3336
LOC409638	Day 7	17.8079
LOC409638	Day 7	17.7468
LOC409638	Day 7	17.891
LOC409638	Day 14	18.664
LOC409638	Day 14	16.6129
LOC409638	Day 14	18.689
LOC409638	Day 14	17.5451
LOC409638	Forager	17.1898
LOC409638	Forager	17.6041
LOC409638	Forager	17.6443
LOC409638	Forager	17.7127
LOC409638	Fostered	16.2838
LOC409638	Fostered	17.5364
LOC409638	Fostered	18.198
LOC409638	Fostered	18.2623
LOC412166	Day 1	18.543
LOC412166	Day 1	19.1373
LOC412166	Day 1	18.4273
LOC412166	Day 1	21.0139
LOC412166	Day 7	20.1847
LOC412166	Day 7	18.9457
LOC412166	Day 7	20.4207
LOC412166	Day 7	19.3336
LOC412166	Day 14	20.2966
LOC412166	Day 14	20.0998
LOC412166	Day 14	18.6873
LOC412166	Day 14	20.4144
LOC412166	Forager	19.4883
LOC412166	Forager	20.4174
LOC412166	Forager	20.9126
LOC412166	Forager	19.9872
LOC412166	Fostered	18.1971
LOC412166	Fostered	20.7852
LOC412166	Fostered	22.2232
LOC412166	Fostered	21.0833
LOC413789	Day 1	21.219
LOC413789	Day 1	21.2766
LOC413789	Day 1	21.4044
LOC413789	Day 1	24.0986
LOC413789	Day 7	19.7654
LOC413789	Day 7	19.5359
LOC413789	Day 7	20.6267
LOC413789	Day 7	20.4358
LOC413789	Day 14	22.8707
LOC413789	Day 14	19.5569
LOC413789	Day 14	20.1599
LOC413789	Day 14	20.2163
LOC413789	Forager	20.3803
LOC413789	Forager	21.5229
LOC413789	Forager	21.7612
LOC413789	Forager	21.0752
LOC413789	Fostered	19.3592
LOC413789	Fostered	22.1454
LOC413789	Fostered	22.0749
LOC413789	Fostered	22.7973
LOC550828	Day 1	18.0785
LOC550828	Day 1	18.33
LOC550828	Day 1	18.586
LOC550828	Day 1	20.5788
LOC550828	Day 7	16.3652
LOC550828	Day 7	18.573
LOC550828	Day 7	20.8492
LOC550828	Day 7	15.8697
LOC550828	Day 14	20.9082
LOC550828	Day 14	16.205
LOC550828	Day 14	15.4059
LOC550828	Day 14	17.4346
LOC550828	Forager	19.096
LOC550828	Forager	21.1785
LOC550828	Forager	21.2432
LOC550828	Forager	20.5654
LOC550828	Fostered	21.54
LOC550828	Fostered	21.0006
LOC550828	Fostered	23.801
LOC550828	Fostered	21.419
LOC551527	Day 1	20.7592
LOC551527	Day 1	22.2479
LOC551527	Day 1	21.0378
LOC551527	Day 1	23.1069
LOC551527	Day 7	19.91
LOC551527	Day 7	18.2363
LOC551527	Day 7	19.1571
LOC551527	Day 7	19.5859
LOC551527	Day 14	19.675
LOC551527	Day 14	20.9975
LOC551527	Day 14	18.4293
LOC551527	Day 14	21.1767
LOC551527	Forager	18.2705
LOC551527	Forager	19.8572
LOC551527	Forager	20.1027
LOC551527	Forager	19.273
LOC551527	Fostered	18.5387
LOC551527	Fostered	19.1613
LOC551527	Fostered	22.8554
LOC551527	Fostered	20.4359
LOC552176	Day 1	24.8829
LOC552176	Day 1	25.1858
LOC552176	Day 1	24.7625
LOC552176	Day 1	27.5102
LOC552176	Day 7	25.2624
LOC552176	Day 7	24.3177
LOC552176	Day 7	25.0622
LOC552176	Day 7	24.8031
LOC552176	Day 14	26.087
LOC552176	Day 14	25.1176
LOC552176	Day 14	23.3886
LOC552176	Day 14	25.478
LOC552176	Forager	24.0888
LOC552176	Forager	25.138
LOC552176	Forager	25.1412
LOC552176	Forager	24.4756
LOC552176	Fostered	25.3253
LOC552176	Fostered	24.9796
LOC552176	Fostered	26.5478
LOC552176	Fostered	25.5225
LOC552417	Day 1	23.1124
LOC552417	Day 1	23.4898
LOC552417	Day 1	23.2559
LOC552417	Day 1	26.2847
LOC552417	Day 7	25.0238
LOC552417	Day 7	24.2505
LOC552417	Day 7	25.3348
LOC552417	Day 7	24.2124
LOC552417	Day 14	25.9024
LOC552417	Day 14	24.6703
LOC552417	Day 14	21.7957
LOC552417	Day 14	26.1207
LOC552417	Forager	23.4014
LOC552417	Forager	24.6268
LOC552417	Forager	22.2219
LOC552417	Forager	24.9891
LOC552417	Fostered	21.993
LOC552417	Fostered	23.9717
LOC552417	Fostered	24.6471
LOC552417	Fostered	25.6958
LOC724552	Day 1	17.586
LOC724552	Day 1	18.7278
LOC724552	Day 1	17.9558
LOC724552	Day 1	19.5427
LOC724552	Day 7	17.0439
LOC724552	Day 7	18.6472
LOC724552	Day 7	23.0479
LOC724552	Day 7	18.0222
LOC724552	Day 14	23.4359
LOC724552	Day 14	16.2372
LOC724552	Day 14	17.66
LOC724552	Day 14	17.9832
LOC724552	Forager	20.775
LOC724552	Forager	23.5853
LOC724552	Forager	22.4008
LOC724552	Forager	21.96
LOC724552	Fostered	22.3036
LOC724552	Fostered	23.886
LOC724552	Fostered	27.2652
LOC724552	Fostered	25.5208
LOC724867	Day 1	27.2179
LOC724867	Day 1	26.8298
LOC724867	Day 1	27.1475
LOC724867	Day 1	29.9408
LOC724867	Day 7	27.0097
LOC724867	Day 7	27.2918
LOC724867	Day 7	27.9411
LOC724867	Day 7	25.8334
LOC724867	Day 14	30.0895
LOC724867	Day 14	23.8458
LOC724867	Day 14	27.0925
LOC724867	Day 14	25.0964
LOC724867	Forager	28.3942
LOC724867	Forager	29.2198
LOC724867	Forager	26.4692
LOC724867	Forager	28.1377
LOC724867	Fostered	27.9279
LOC724867	Fostered	28.7952
LOC724867	Fostered	29.0679
LOC724867	Fostered	30.2527
LOC725031	Day 1	17.0097
LOC725031	Day 1	17.7157
LOC725031	Day 1	17.0285
LOC725031	Day 1	20.0038
LOC725031	Day 7	18.3212
LOC725031	Day 7	18.2767
LOC725031	Day 7	19.0461
LOC725031	Day 7	18.8584
LOC725031	Day 14	19.5682
LOC725031	Day 14	19.0278
LOC725031	Day 14	18.1711
LOC725031	Day 14	19.1535
LOC725031	Forager	18.8805
LOC725031	Forager	19.506
LOC725031	Forager	20.4656
LOC725031	Forager	19.4727
LOC725031	Fostered	18.9928
LOC725031	Fostered	20.2177
LOC725031	Fostered	20.6131
LOC725031	Fostered	19.4801
LOC725842	Day 1	18.1088
LOC725842	Day 1	19.5292
LOC725842	Day 1	17.9807
LOC725842	Day 1	20.0509
LOC725842	Day 7	19.0114
LOC725842	Day 7	20.3516
LOC725842	Day 7	23.9813
LOC725842	Day 7	20.3875
LOC725842	Day 14	24.1829
LOC725842	Day 14	18.9855
LOC725842	Day 14	19.8802
LOC725842	Day 14	19.2135
LOC725842	Forager	21.362
LOC725842	Forager	25.0223
LOC725842	Forager	26.6865
LOC725842	Forager	23.2195
LOC725842	Fostered	26.3152
LOC725842	Fostered	25.4347
LOC725842	Fostered	26.4138
LOC725842	Fostered	26.8507
LOC726467	Day 1	19.6408
LOC726467	Day 1	20.6106
LOC726467	Day 1	22.1286
LOC726467	Day 1	23.6178
LOC726467	Day 7	22.4658
LOC726467	Day 7	23.9793
LOC726467	Day 7	25.7173
LOC726467	Day 7	24.5661
LOC726467	Day 14	26.2554
LOC726467	Day 14	23.1458
LOC726467	Day 14	22.3331
LOC726467	Day 14	23.4245
LOC726467	Forager	24.5246
LOC726467	Forager	25.3035
LOC726467	Forager	29.0202
LOC726467	Forager	25.0743
LOC726467	Fostered	25.9786
LOC726467	Fostered	28.0255
LOC726467	Fostered	28.2407
LOC726467	Fostered	27.0352
LOC727166	Day 1	23.2347
LOC727166	Day 1	22.9948
LOC727166	Day 1	23.0648
LOC727166	Day 1	25.0722
LOC727166	Day 7	22.6492
LOC727166	Day 7	21.2704
LOC727166	Day 7	22.9173
LOC727166	Day 7	21.866
LOC727166	Day 14	22.1546
LOC727166	Day 14	21.8387
LOC727166	Day 14	22.2728
LOC727166	Day 14	22.4428
LOC727166	Forager	21.0728
LOC727166	Forager	22.4381
LOC727166	Forager	22.9064
LOC727166	Forager	22.7707
LOC727166	Fostered	21.0649
LOC727166	Fostered	21.7702
LOC727166	Fostered	21.6044
LOC727166	Fostered	22.3554
LOC727333	Day 1	18.0659
LOC727333	Day 1	18.1724
LOC727333	Day 1	18.0348
LOC727333	Day 1	20.4144
LOC727333	Day 7	16.7525
LOC727333	Day 7	16.6468
LOC727333	Day 7	18.2148
LOC727333	Day 7	15.7243
LOC727333	Day 14	18.7864
LOC727333	Day 14	16.8377
LOC727333	Day 14	16.1302
LOC727333	Day 14	17.3252
LOC727333	Forager	19.2168
LOC727333	Forager	17.0459
LOC727333	Forager	17.4408
LOC727333	Forager	17.8897
LOC727333	Fostered	18.8697
LOC727333	Fostered	19.1688
LOC727333	Fostered	19.8308
LOC727333	Fostered	19.7126
LOC100576797	Day 1	16.9836
LOC100576797	Day 1	16.9715
LOC100576797	Day 1	17.0714
LOC100576797	Day 1	19.0767
LOC100576797	Day 7	15.1343
LOC100576797	Day 7	15.3526
LOC100576797	Day 7	18.3413
LOC100576797	Day 7	14.129
LOC100576797	Day 14	17.5551
LOC100576797	Day 14	15.4524
LOC100576797	Day 14	14.3022
LOC100576797	Day 14	15.4256
LOC100576797	Forager	16.5735
LOC100576797	Forager	16.7637
LOC100576797	Forager	18.0847
LOC100576797	Forager	16.6467
LOC100576797	Fostered	21.3062
LOC100576797	Fostered	18.4961
LOC100576797	Fostered	23.5229
LOC100576797	Fostered	19.0408
LOC100578829	Day 1	25.5585
LOC100578829	Day 1	26.4164
LOC100578829	Day 1	26.1084
LOC100578829	Day 1	28.4806
LOC100578829	Day 7	26.0042
LOC100578829	Day 7	24.2655
LOC100578829	Day 7	25.6518
LOC100578829	Day 7	25.2664
LOC100578829	Day 14	25.8217
LOC100578829	Day 14	25.9106
LOC100578829	Day 14	24.4105
LOC100578829	Day 14	25.2235
LOC100578829	Forager	24.6059
LOC100578829	Forager	25.4225
LOC100578829	Forager	25.2983
LOC100578829	Forager	24.2617
LOC100578829	Fostered	25.0962
LOC100578829	Fostered	25.5346
LOC100578829	Fostered	24.3022
LOC100578829	Fostered	27.2746
EIF3-S8	Day 1	20.0744
EIF3-S8	Day 1	20.5402
EIF3-S8	Day 1	20.0389
EIF3-S8	Day 1	22.8814
EIF3-S8	Day 7	21.1747
EIF3-S8	Day 7	20.6057
EIF3-S8	Day 7	21.1559
EIF3-S8	Day 7	20.8616
EIF3-S8	Day 14	22.092
EIF3-S8	Day 14	21.6301
EIF3-S8	Day 14	20.1559
EIF3-S8	Day 14	22.1505
EIF3-S8	Forager	20.5024
EIF3-S8	Forager	21.2621
EIF3-S8	Forager	21.4011
EIF3-S8	Forager	20.9019
EIF3-S8	Fostered	20.8618
EIF3-S8	Fostered	21.0874
EIF3-S8	Fostered	22.2497
EIF3-S8	Fostered	21.9992
