# Supplementary material for: The cuticular hydrocarbon profiles of honey bee workers develop via a socially-modulated innate process
Source: eLife. 2019 Feb 5;8:e41855. doi: 10.7554/eLife.41855 (PMC6382352; doi:10.7554/eLife.41855)
Supplement: Figure 5—source data 1. [file elife-41855-fig5-data1.xlsx]

## Sheet: Sheet1
Location	Day	Hive	Accepted/Rejected
Colony 1	1	Colony 2 forager	A
Colony 1	1	Colony 1 forager	A
Colony 1	1	Day 1 experimental	A
Colony 1	1	Colony 2 forager	R
Colony 1	1	Colony 2 forager	R
Colony 1	1	Colony 1 forager	A
Colony 1	1	Day 1 experimental	A
Colony 1	1	Colony 2 forager	R
Colony 1	1	Colony 2 forager	R
Colony 1	1	Colony 1 forager	A
Colony 1	1	Colony 2 forager	R
Colony 1	1	Day 1 experimental	A
Colony 1	1	Day 1 experimental	A
Colony 1	1	Day 1 experimental	A
Colony 1	1	Colony 2 forager	R
Colony 1	1	Colony 1 forager	A
Colony 1	1	Colony 1 forager	A
Colony 1	1	Day 1 experimental	R
Colony 1	1	Colony 1 forager	A
Colony 1	1	Colony 2 forager	R
Colony 1	1	Day 1 experimental	A
Colony 1	1	Colony 1 forager	A
Colony 1	1	Colony 1 forager	A
Colony 1	1	Colony 1 forager	A
Colony 1	1	Day 1 experimental	A
Colony 1	1	Colony 2 forager	R
Colony 1	1	Day 1 experimental	A
Colony 1	1	Colony 2 forager	R
Colony 1	1	Day 1 experimental	A
Colony 1	1	Colony 1 forager	A
Colony 1	1	Colony 1 forager	A
Colony 1	1	Day 1 experimental	A
Colony 1	1	Day 1 experimental	A
Colony 1	1	Colony 2 forager	R
Colony 1	1	Day 1 experimental	R
Colony 1	1	Colony 2 forager	R
Colony 1	1	Colony 1 forager	A
Colony 1	1	Colony 2 forager	R
Colony 1	1	Colony 2 forager	R
Colony 1	1	Colony 1 forager	A
Colony 1	1	Colony 1 forager	A
Colony 2	1	Colony 2 forager	A
Colony 2	1	Colony 1 forager	R
Colony 2	1	Day 1 experimental	A
Colony 2	1	Colony 2 forager	A
Colony 2	1	Colony 2 forager	A
Colony 2	1	Day 1 experimental	R
Colony 2	1	Colony 1 forager	R
Colony 2	1	Colony 2 forager	A
Colony 2	1	Colony 1 forager	A
Colony 2	1	Day 1 experimental	R
Colony 2	1	Colony 1 forager	A
Colony 2	1	Colony 1 forager	A
Colony 2	1	Colony 2 forager	A
Colony 2	1	Day 1 experimental	A
Colony 2	1	Colony 1 forager	R
Colony 2	1	Colony 1 forager	A
Colony 2	1	Day 1 experimental	A
Colony 2	1	Day 1 experimental	A
Colony 2	1	Colony 2 forager	A
Colony 2	1	Colony 2 forager	A
Colony 2	1	Day 1 experimental	R
Colony 2	1	Day 1 experimental	R
Colony 2	1	Colony 1 forager	R
Colony 2	1	Day 1 experimental	R
Colony 2	1	Colony 1 forager	R
Colony 2	1	Colony 2 forager	A
Colony 2	1	Day 1 experimental	R
Colony 2	1	Day 1 experimental	R
Colony 2	1	Colony 2 forager	A
Colony 2	1	Colony 1 forager	A
Colony 2	1	Day 1 experimental	A
Colony 2	1	Day 1 experimental	A
Colony 2	1	Day 1 experimental	A
Colony 2	1	Colony 2 forager	A
Colony 2	1	Day 1 experimental	R
Colony 2	1	Colony 1 forager	R
Colony 2	1	Colony 2 forager	A
Colony 2	1	Colony 1 forager	A
Colony 1	1	Colony 1 forager	A
Colony 1	1	Day 1 experimental	A
Colony 1	1	Colony 1 forager	A
Colony 1	1	Colony 1 forager	A
Colony 1	1	Colony 2 forager	R
Colony 1	1	Day 1 experimental	A
Colony 1	1	Colony 2 forager	R
Colony 1	1	Colony 1 forager	A
Colony 1	1	Day 1 experimental	A
Colony 1	1	Colony 2 forager	R
Colony 1	1	Colony 1 forager	A
Colony 1	1	Colony 2 forager	R
Colony 1	1	Colony 1 forager	A
Colony 1	1	Day 1 experimental	A
Colony 1	1	Day 1 experimental	A
Colony 1	1	Colony 1 forager	A
Colony 1	1	Colony 2 forager	R
Colony 1	1	Day 1 experimental	A
Colony 1	1	Day 1 experimental	A
Colony 1	1	Colony 1 forager	A
Colony 1	1	Colony 2 forager	R
Colony 1	1	Day 1 experimental	A
Colony 1	1	Colony 2 forager	R
Colony 1	1	Day 1 experimental	A
Colony 1	1	Day 1 experimental	A
Colony 1	1	Colony 1 forager	A
Colony 1	1	Colony 2 forager	R
Colony 1	1	Day 1 experimental	A
Colony 1	1	Colony 1 forager	R
Colony 1	1	Day 1 experimental	R
Colony 1	1	Colony 2 forager	R
Colony 1	1	Day 1 experimental	R
Colony 1	1	Colony 1 forager	R
Colony 1	1	Day 1 experimental	A
Colony 1	1	Colony 1 forager	R
Colony 1	1	Day 1 experimental	A
Colony 1	1	Colony 2 forager	R
Colony 1	1	Colony 1 forager	A
Colony 2	1	Colony 2 forager	A
Colony 2	1	Colony 1 forager	R
Colony 2	1	Day 1 experimental	A
Colony 2	1	Colony 1 forager	A
Colony 2	1	Colony 1 forager	R
Colony 2	1	Day 1 experimental	A
Colony 2	1	Day 1 experimental	R
Colony 2	1	Colony 2 forager	A
Colony 2	1	Day 1 experimental	R
Colony 2	1	Colony 1 forager	R
Colony 2	1	Day 1 experimental	A
Colony 2	1	Day 1 experimental	A
Colony 2	1	Colony 2 forager	R
Colony 2	1	Colony 1 forager	R
Colony 2	1	Day 1 experimental	A
Colony 2	1	Colony 1 forager	A
Colony 2	1	Day 1 experimental	A
Colony 2	1	Colony 1 forager	R
Colony 2	1	Day 1 experimental	R
Colony 2	1	Colony 2 forager	A
Colony 2	1	Colony 1 forager	R
Colony 2	1	Colony 2 forager	A
Colony 2	1	Day 1 experimental	A
Colony 2	1	Colony 1 forager	A
Colony 2	1	Colony 2 forager	A
Colony 2	1	Day 1 experimental	A
Colony 2	1	Colony 1 forager	R
Colony 2	1	Day 1 experimental	R
Colony 2	1	Day 1 experimental	A
Colony 2	1	Colony 2 forager	A
Colony 2	1	Day 1 experimental	A
Colony 2	1	Colony 1 forager	A
Colony 1	7	Colony 2 forager	R
Colony 1	7	Colony 1 forager	R
Colony 1	7	Day 7 experimental	A
Colony 1	7	Colony 1 forager	A
Colony 1	7	Day 7 experimental	A
Colony 1	7	Day 7 experimental	A
Colony 1	7	Colony 1 forager	A
Colony 1	7	Colony 2 forager	R
Colony 1	7	Day 7 experimental	A
Colony 1	7	Colony 1 forager	R
Colony 1	7	Colony 2 forager	R
Colony 1	7	Colony 1 forager	A
Colony 1	7	Colony 2 forager	A
Colony 1	7	Colony 1 forager	A
Colony 1	7	Day 7 experimental	A
Colony 1	7	Day 7 experimental	A
Colony 1	7	Colony 2 forager	R
Colony 1	7	Colony 1 forager	A
Colony 1	7	Day 7 experimental	A
Colony 1	7	Colony 2 forager	R
Colony 1	7	Day 7 experimental	R
Colony 1	7	Colony 1 forager	A
Colony 1	7	Colony 2 forager	R
Colony 1	7	Day 7 experimental	R
Colony 1	7	Colony 2 forager	R
Colony 1	7	Colony 1 forager	A
Colony 1	7	Colony 1 forager	R
Colony 1	7	Day 7 experimental	R
Colony 1	7	Day 7 experimental	A
Colony 1	7	Colony 1 forager	R
Colony 1	7	Day 7 experimental	A
Colony 1	7	Day 7 experimental	A
Colony 1	7	Colony 2 forager	R
Colony 1	7	Colony 2 forager	R
Colony 1	7	Day 7 experimental	R
Colony 1	7	Colony 2 forager	R
Colony 1	7	Colony 2 forager	R
Colony 2	7	Colony 2 forager	A
Colony 2	7	Colony 2 forager	A
Colony 2	7	Day 7 experimental	R
Colony 2	7	Colony 1 forager	R
Colony 2	7	Day 7 experimental	A
Colony 2	7	Colony 2 forager	A
Colony 2	7	Colony 1 forager	R
Colony 2	7	Day 7 experimental	R
Colony 2	7	Day 7 experimental	A
Colony 2	7	Colony 1 forager	R
Colony 2	7	Day 7 experimental	A
Colony 2	7	Colony 1 forager	R
Colony 2	7	Colony 2 forager	A
Colony 2	7	Colony 1 forager	R
Colony 2	7	Colony 1 forager	A
Colony 2	7	Colony 2 forager	R
Colony 2	7	Day 7 experimental	A
Colony 2	7	Day 7 experimental	A
Colony 2	7	Colony 1 forager	R
Colony 2	7	Colony 2 forager	R
Colony 2	7	Colony 2 forager	R
Colony 2	7	Day 7 experimental	A
Colony 2	7	Colony 1 forager	A
Colony 2	7	Day 7 experimental	R
Colony 2	7	Day 7 experimental	A
Colony 2	7	Day 7 experimental	A
Colony 2	7	Day 7 experimental	A
Colony 2	7	Colony 1 forager	A
Colony 2	7	Colony 1 forager	R
Colony 2	7	Day 7 experimental	A
Colony 2	7	Colony 2 forager	A
Colony 2	7	Day 7 experimental	A
Colony 2	7	Colony 1 forager	R
Colony 2	7	Colony 1 forager	A
Colony 2	7	Colony 2 forager	A
Colony 2	7	Day 7 experimental	A
Colony 2	7	Colony 2 forager	A
Colony 2	7	Colony 2 forager	A
Colony 1	7	Day 7 experimental	A
Colony 1	7	Colony 2 forager	R
Colony 1	7	Colony 1 forager	A
Colony 1	7	Colony 2 forager	R
Colony 1	7	Colony 2 forager	R
Colony 1	7	Day 7 experimental	A
Colony 1	7	Colony 2 forager	R
Colony 1	7	Day 7 experimental	A
Colony 1	7	Colony 2 forager	R
Colony 1	7	Colony 1 forager	A
Colony 1	7	Colony 1 forager	R
Colony 1	7	Day 7 experimental	A
Colony 1	7	Colony 2 forager	A
Colony 1	7	Colony 1 forager	R
Colony 1	7	Colony 1 forager	A
Colony 1	7	Day 7 experimental	A
Colony 1	7	Colony 1 forager	A
Colony 1	7	Colony 2 forager	R
Colony 1	7	Day 7 experimental	R
Colony 1	7	Colony 1 forager	R
Colony 1	7	Day 7 experimental	A
Colony 1	7	Colony 2 forager	A
Colony 1	7	Colony 1 forager	A
Colony 1	7	Colony 1 forager	A
Colony 1	7	Day 7 experimental	A
Colony 1	7	Day 7 experimental	A
Colony 1	7	Day 7 experimental	R
Colony 1	7	Colony 1 forager	A
Colony 1	7	Colony 2 forager	R
Colony 1	7	Day 7 experimental	R
Colony 1	7	Day 7 experimental	A
Colony 1	7	Colony 1 forager	A
Colony 1	7	Colony 2 forager	A
Colony 1	7	Day 7 experimental	A
Colony 1	7	Colony 1 forager	A
Colony 1	7	Colony 1 forager	A
Colony 1	7	Day 7 experimental	A
Colony 2	7	Colony 1 forager	R
Colony 2	7	Day 7 experimental	R
Colony 2	7	Day 7 experimental	A
Colony 2	7	Colony 2 forager	R
Colony 2	7	Colony 1 forager	R
Colony 2	7	Colony 1 forager	A
Colony 2	7	Day 7 experimental	A
Colony 2	7	Colony 2 forager	A
Colony 2	7	Colony 2 forager	A
Colony 2	7	Day 7 experimental	R
Colony 2	7	Colony 1 forager	A
Colony 2	7	Day 7 experimental	A
Colony 2	7	Colony 1 forager	R
Colony 2	7	Colony 2 forager	A
Colony 2	7	Day 7 experimental	R
Colony 2	7	Colony 1 forager	R
Colony 2	7	Colony 1 forager	R
Colony 2	7	Day 7 experimental	A
Colony 2	7	Colony 2 forager	A
Colony 2	7	Day 7 experimental	A
Colony 2	7	Colony 1 forager	A
Colony 2	7	Colony 2 forager	R
Colony 2	7	Day 7 experimental	A
Colony 2	7	Colony 1 forager	A
Colony 2	7	Day 7 experimental	A
Colony 2	7	Colony 2 forager	A
Colony 2	7	Day 7 experimental	A
Colony 2	7	Day 7 experimental	A
Colony 2	7	Colony 1 forager	R
Colony 2	7	Colony 2 forager	A
Colony 2	7	Day 7 experimental	A
Colony 2	7	Colony 1 forager	R
Colony 2	7	Day 7 experimental	A
Colony 2	7	Colony 1 forager	R
Colony 2	7	Day 7 experimental	A
Colony 2	7	Colony 2 forager	R
Colony 2	7	Colony 1 forager	R
Colony 2	7	Colony 1 forager	R
Colony 2	7	Colony 2 forager	A
Colony 1	14	Day 14 experimental	A
Colony 1	14	Colony 1 forager	A
Colony 1	14	Colony 2 forager	R
Colony 1	14	Day 14 experimental	A
Colony 1	14	Colony 2 forager	R
Colony 1	14	Day 14 experimental	A
Colony 1	14	Colony 1 forager	A
Colony 1	14	Day 14 experimental	A
Colony 1	14	Day 14 experimental	A
Colony 1	14	Colony 1 forager	A
Colony 1	14	Colony 2 forager	R
Colony 1	14	Day 14 experimental	A
Colony 1	14	Colony 2 forager	R
Colony 1	14	Colony 2 forager	R
Colony 1	14	Colony 1 forager	A
Colony 1	14	Day 14 experimental	A
Colony 1	14	Day 14 experimental	A
Colony 1	14	Colony 1 forager	R
Colony 1	14	Colony 2 forager	R
Colony 1	14	Colony 2 forager	R
Colony 1	14	Colony 2 forager	R
Colony 1	14	Day 14 experimental	A
Colony 1	14	Colony 1 forager	R
Colony 1	14	Colony 2 forager	R
Colony 1	14	Day 14 experimental	A
Colony 1	14	Day 14 experimental	A
Colony 1	14	Colony 2 forager	R
Colony 1	14	Colony 1 forager	R
Colony 1	14	Day 14 experimental	A
Colony 1	14	Day 14 experimental	A
Colony 1	14	Day 14 experimental	A
Colony 1	14	Colony 1 forager	R
Colony 1	14	Colony 2 forager	R
Colony 2	14	Colony 2 forager	A
Colony 2	14	Day 14 experimental	A
Colony 2	14	Colony 1 forager	R
Colony 2	14	Colony 2 forager	R
Colony 2	14	Day 14 experimental	R
Colony 2	14	Colony 2 forager	A
Colony 2	14	Day 14 experimental	R
Colony 2	14	Colony 2 forager	A
Colony 2	14	Colony 1 forager	R
Colony 2	14	Colony 2 forager	A
Colony 2	14	Colony 2 forager	R
Colony 2	14	Colony 1 forager	R
Colony 2	14	Day 14 experimental	R
Colony 2	14	Colony 1 forager	R
Colony 2	14	Day 14 experimental	R
Colony 2	14	Colony 1 forager	R
Colony 2	14	Day 14 experimental	A
Colony 2	14	Colony 1 forager	R
Colony 2	14	Colony 2 forager	R
Colony 2	14	Colony 1 forager	R
Colony 2	14	Colony 2 forager	A
Colony 2	14	Day 14 experimental	R
Colony 2	14	Day 14 experimental	A
Colony 2	14	Colony 1 forager	R
Colony 2	14	Colony 1 forager	A
Colony 2	14	Colony 1 forager	R
Colony 2	14	Day 14 experimental	A
Colony 2	14	Colony 2 forager	R
Colony 2	14	Day 14 experimental	R
Colony 2	14	Colony 1 forager	R
Colony 2	14	Colony 2 forager	A
Colony 2	14	Colony 2 forager	R
Colony 2	14	Day 14 experimental	A
Colony 2	14	Day 14 experimental	A
Colony 2	14	Day 14 experimental	A
Colony 2	14	Colony 2 forager	A
Colony 2	14	Colony 1 forager	R
Colony 2	14	Colony 1 forager	R
Colony 1	14	Colony 1 forager	A
Colony 1	14	Colony 2 forager	A
Colony 1	14	Colony 1 forager	A
Colony 1	14	Day 14 experimental	A
Colony 1	14	Colony 1 forager	A
Colony 1	14	Colony 1 forager	R
Colony 1	14	Day 14 experimental	A
Colony 1	14	Colony 1 forager	R
Colony 1	14	Day 14 experimental	A
Colony 1	14	Colony 1 forager	R
Colony 1	14	Day 14 experimental	A
Colony 1	14	Colony 1 forager	A
Colony 1	14	Colony 2 forager	R
Colony 1	14	Day 14 experimental	A
Colony 1	14	Colony 1 forager	A
Colony 1	14	Colony 2 forager	R
Colony 1	14	Colony 2 forager	A
Colony 1	14	Day 14 experimental	A
Colony 1	14	Colony 1 forager	A
Colony 1	14	Colony 2 forager	A
Colony 1	14	Day 14 experimental	A
Colony 1	14	Day 14 experimental	A
Colony 1	14	Colony 1 forager	A
Colony 1	14	Colony 2 forager	R
Colony 1	14	Colony 2 forager	R
Colony 1	14	Colony 1 forager	R
Colony 1	14	Day 14 experimental	A
Colony 1	14	Colony 1 forager	R
Colony 1	14	Colony 1 forager	R
Colony 1	14	Colony 2 forager	R
Colony 1	14	Day 14 experimental	A
Colony 1	14	Colony 1 forager	A
Colony 1	14	Colony 1 forager	R
Colony 1	14	Day 14 experimental	A
Colony 1	14	Colony 1 forager	A
Colony 1	14	Day 14 experimental	A
Colony 1	14	Colony 2 forager	A
Colony 1	14	Colony 1 forager	A
Colony 1	14	Colony 2 forager	R
Colony 1	14	Colony 2 forager	R
Colony 1	14	Day 14 experimental	A
Colony 1	14	Day 14 experimental	R
Colony 2	14	Colony 2 forager	A
Colony 2	14	Day 14 experimental	R
Colony 2	14	Day 14 experimental	A
Colony 2	14	Colony 2 forager	R
Colony 2	14	Colony 2 forager	R
Colony 2	14	Colony 1 forager	R
Colony 2	14	Colony 1 forager	R
Colony 2	14	Colony 2 forager	A
Colony 2	14	Day 14 experimental	A
Colony 2	14	Day 14 experimental	R
Colony 2	14	Colony 1 forager	R
Colony 2	14	Day 14 experimental	R
Colony 2	14	Colony 1 forager	R
Colony 2	14	Colony 2 forager	A
Colony 2	14	Colony 1 forager	R
Colony 2	14	Day 14 experimental	A
Colony 2	14	Colony 1 forager	R
Colony 2	14	Colony 1 forager	R
Colony 2	14	Day 14 experimental	R
Colony 2	14	Day 14 experimental	R
Colony 2	14	Colony 1 forager	A
Colony 2	14	Day 14 experimental	A
Colony 2	14	Colony 1 forager	R
Colony 2	14	Colony 1 forager	A
Colony 2	14	Day 14 experimental	R
Colony 2	14	Colony 2 forager	R
Colony 2	14	Colony 1 forager	R
Colony 2	14	Day 14 experimental	A
Colony 2	14	Colony 2 forager	A
Colony 2	14	Colony 1 forager	R
Colony 2	14	Colony 1 forager	R
Colony 2	14	Day 14 experimental	A
Colony 2	14	Day 14 experimental	A
Colony 2	14	Colony 1 forager	R
Colony 2	14	Colony 2 forager	A
Colony 2	14	Colony 1 forager	A
Colony 2	14	Colony 2 forager	R
Colony 2	14	Day 14 experimental	R
Colony 1	14	Day 14 experimental	A
Colony 1	14	Colony 1 forager	A
Colony 1	14	Colony 2 forager	R
Colony 1	14	Colony 1 forager	R
Colony 1	14	Colony 1 forager	A
Colony 1	14	Colony 2 forager	R
Colony 1	14	Day 14 experimental	A
Colony 1	14	Colony 1 forager	A
Colony 1	14	Day 14 experimental	A
Colony 1	14	Colony 1 forager	R
Colony 1	14	Day 14 experimental	A
Colony 1	14	Colony 1 forager	R
Colony 1	14	Day 14 experimental	A
Colony 1	14	Colony 1 forager	R
Colony 1	14	Colony 2 forager	R
Colony 1	14	Colony 2 forager	A
Colony 1	14	Day 14 experimental	A
Colony 1	14	Colony 2 forager	R
Colony 1	14	Colony 1 forager	A
Colony 1	14	Colony 1 forager	R
Colony 1	14	Day 14 experimental	R
Colony 1	14	Day 14 experimental	A
Colony 1	14	Colony 1 forager	R
Colony 1	14	Colony 2 forager	A
Colony 1	14	Colony 2 forager	R
Colony 1	14	Colony 1 forager	A
Colony 1	14	Day 14 experimental	R
Colony 1	14	Colony 2 forager	R
Colony 1	14	Colony 2 forager	R
Colony 1	14	Colony 1 forager	A
Colony 1	14	Colony 2 forager	R
Colony 1	14	Colony 1 forager	A
Colony 1	14	Day 14 experimental	A
Colony 1	14	Colony 1 forager	A
Colony 1	14	Day 14 experimental	A
Colony 1	14	Colony 2 forager	R
Colony 1	14	Colony 1 forager	R
Colony 1	14	Colony 1 forager	R
Colony 1	14	Day 14 experimental	A
Colony 1	14	Day 14 experimental	A
Colony 1	14	Colony 1 forager	R
Colony 1	14	Colony 2 forager	R
Colony 1	14	Day 14 experimental	A
Colony 1	14	Colony 2 forager	R
Colony 1	14	Colony 1 forager	A
Colony 1	14	Colony 1 forager	R
Colony 1	21	Colony 1 forager	A
Colony 1	21	Foraging experimental	A
Colony 1	21	Foraging experimental	A
Colony 1	21	Foraging experimental	A
Colony 1	21	Foraging experimental	R
Colony 1	21	Colony 2 forager	R
Colony 1	21	Colony 1 forager	R
Colony 1	21	Foraging experimental	A
Colony 1	21	Colony 1 forager	A
Colony 1	21	Colony 1 forager	R
Colony 1	21	Colony 2 forager	R
Colony 1	21	Foraging experimental	A
Colony 1	21	Colony 2 forager	R
Colony 1	21	Colony 2 forager	R
Colony 1	21	Foraging experimental	R
Colony 1	21	Foraging experimental	A
Colony 1	21	Colony 2 forager	R
Colony 1	21	Colony 1 forager	A
Colony 1	21	Foraging experimental	A
Colony 1	21	Colony 2 forager	R
Colony 1	21	Colony 1 forager	A
Colony 1	21	Foraging experimental	R
Colony 1	21	Colony 2 forager	R
Colony 1	21	Foraging experimental	R
Colony 1	21	Colony 2 forager	R
Colony 1	21	Foraging experimental	A
Colony 1	21	Colony 1 forager	A
Colony 1	21	Colony 2 forager	R
Colony 2	21	Colony 2 forager	A
Colony 2	21	Foraging experimental	A
Colony 2	21	Colony 2 forager	A
Colony 2	21	Foraging experimental	A
Colony 2	21	Colony 1 forager	R
Colony 2	21	Colony 1 forager	R
Colony 2	21	Colony 2 forager	R
Colony 2	21	Foraging experimental	R
Colony 2	21	Colony 2 forager	A
Colony 2	21	Foraging experimental	R
Colony 2	21	Colony 1 forager	R
Colony 2	21	Foraging experimental	R
Colony 2	21	Colony 1 forager	R
Colony 2	21	Colony 1 forager	R
Colony 2	21	Foraging experimental	R
Colony 2	21	Colony 1 forager	A
Colony 2	21	Foraging experimental	R
Colony 2	21	Foraging experimental	R
Colony 2	21	Colony 2 forager	A
Colony 2	21	Foraging experimental	A
Colony 2	21	Colony 1 forager	A
Colony 2	21	Colony 1 forager	R
Colony 2	21	Colony 2 forager	A
Colony 2	21	Foraging experimental	R
Colony 2	21	Colony 1 forager	R
Colony 2	21	Colony 2 forager	A
Colony 2	21	Foraging experimental	R
Colony 2	21	Colony 1 forager	R
Colony 2	21	Colony 2 forager	R
Colony 2	21	Foraging experimental	R
Colony 2	21	Colony 1 forager	R
Colony 2	21	Colony 1 forager	R
Colony 2	21	Foraging experimental	A
Colony 1	21	Colony 2 forager	R
Colony 1	21	Foraging experimental	A
Colony 1	21	Colony 2 forager	R
Colony 1	21	Colony 1 forager	A
Colony 1	21	Colony 2 forager	R
Colony 1	21	Colony 1 forager	A
Colony 1	21	Colony 1 forager	A
Colony 1	21	Colony 2 forager	R
Colony 1	21	Foraging experimental	A
Colony 1	21	Colony 2 forager	R
Colony 1	21	Colony 2 forager	R
Colony 1	21	Foraging experimental	R
Colony 1	21	Colony 1 forager	A
Colony 1	21	Foraging experimental	A
Colony 1	21	Colony 2 forager	R
Colony 1	21	Colony 1 forager	R
Colony 1	21	Foraging experimental	A
Colony 1	21	Colony 2 forager	R
Colony 1	21	Colony 1 forager	R
Colony 1	21	Foraging experimental	A
Colony 1	21	Foraging experimental	A
Colony 1	21	Colony 1 forager	A
Colony 1	21	Foraging experimental	A
Colony 1	21	Colony 1 forager	A
Colony 1	21	Colony 1 forager	A
Colony 1	21	Colony 2 forager	A
Colony 1	21	Colony 1 forager	A
Colony 1	21	Colony 2 forager	R
Colony 1	21	Foraging experimental	A
Colony 1	21	Foraging experimental	A
Colony 1	21	Colony 1 forager	A
Colony 1	21	Foraging experimental	R
Colony 1	21	Colony 2 forager	R
Colony 1	21	Colony 1 forager	A
Colony 1	21	Foraging experimental	R
Colony 1	21	Foraging experimental	A
Colony 1	21	Colony 2 forager	R
Colony 2	21	Colony 2 forager	R
Colony 2	21	Colony 1 forager	R
Colony 2	21	Foraging experimental	A
Colony 2	21	Colony 2 forager	A
Colony 2	21	Foraging experimental	A
Colony 2	21	Colony 1 forager	R
Colony 2	21	Colony 2 forager	R
Colony 2	21	Foraging experimental	R
Colony 2	21	Colony 1 forager	R
Colony 2	21	Colony 1 forager	R
Colony 2	21	Foraging experimental	R
Colony 2	21	Foraging experimental	R
Colony 2	21	Colony 1 forager	R
Colony 2	21	Colony 2 forager	A
Colony 2	21	Colony 1 forager	R
Colony 2	21	Foraging experimental	R
Colony 2	21	Colony 1 forager	R
Colony 2	21	Colony 2 forager	A
Colony 2	21	Colony 2 forager	A
Colony 2	21	Foraging experimental	R
Colony 2	21	Foraging experimental	R
Colony 2	21	Colony 2 forager	A
Colony 2	21	Colony 1 forager	R
Colony 2	21	Foraging experimental	A
Colony 2	21	Foraging experimental	A
Colony 2	21	Colony 2 forager	A
Colony 2	21	Colony 1 forager	R
Colony 2	21	Foraging experimental	A
Colony 2	21	Colony 1 forager	R
Colony 2	21	Colony 1 forager	A
Colony 2	21	Colony 2 forager	A
Colony 2	21	Colony 2 forager	R
Colony 2	21	Foraging experimental	R
Colony 2	21	Colony 1 forager	A
Colony 2	21	Foraging experimental	R
Colony 2	21	Colony 2 forager	A
Colony 2	21	Colony 1 forager	A
Colony 2	21	Foraging experimental	R
Colony 2	21	Colony 2 forager	A
Colony 2	21	Foraging experimental	R
